# Supplementary material for: Identification of miRNAs and their targets in wild tomato at moderately and acutely elevated temperatures by high-throughput sequencing and degradome analysis
Source: PubMed Central journal article supplement (PMC5031959; doi:10.1038/srep33777), 2016-09-22
Supplement: srep33777-s1.pdf [file srep33777-s1.pdf]

**Supplementary Information in pdf format** of the paper titled 'Identification of miRNAs and their targets in wild tomato at moderately and acutely elevated temperatures by high-throughput sequencing and degradome analysis' by Rong Zhou, Qian Wang, Fangling Jiang, Xue Cao, Mintao Sun, Min Liu and Zhen Wu.

**Supplementary Information** of the paper titled 'Identification of miRNAs and their targets in wild tomato at moderately and acutely elevated temperatures by high-throughput sequencing and degradome analysis' by Rong Zhou, Qian Wang, Fangling Jiang, Xue Cao, Mintao Sun, Min Liu and Zhen Wu.

**Supplementary Figure S1.** Folding structures of novel miRNAs in tomato LA2093 at a control temperature (26/18°C, NT), moderately elevated temperature (33/33°C, MET) and acutely elevated temperature (40/40°C, AET)

**Supplementary Figure S2.** GO functional annotation of target genes cleaved by conserved miRNAs in tomato LA2093

**Supplementary Figure S3.** GO enrichment analysis of the target genes that predicted by Targetfinder and detected by degradome sequencing with different expression levels cleaved by miRNAs with different expression levels in tomato LA2093. **(A)** MET vs NT, **(B)** AET vs NT. The x-axis indicated rich factor; the y-axis indicated GO term. The size of the circle indicated the number of genes with the functions; the different colours of the circle indicated different significance levels.

**Supplementary Figure S4.** Target plots of some mRNAs from category 0 in tomato LA2093 at **(A)** a control temperature (26/18°C, NT), **(B)** moderately elevated temperature (33/33°C, MET) and **(C)** acutely elevated temperature (40/40°C, AET)



Output of `sir_graph ( )`  
by D. Stewart and M. Zuker

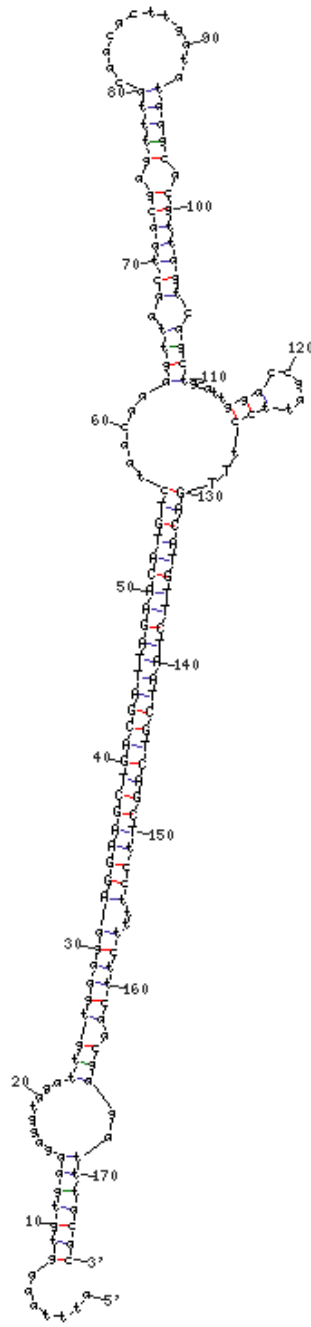

$$dG = -72.6 \mu\text{PC-2}$$

**PC-2**

Output of `mir_graph ( )`  
by D. Stewart and M. Zuker

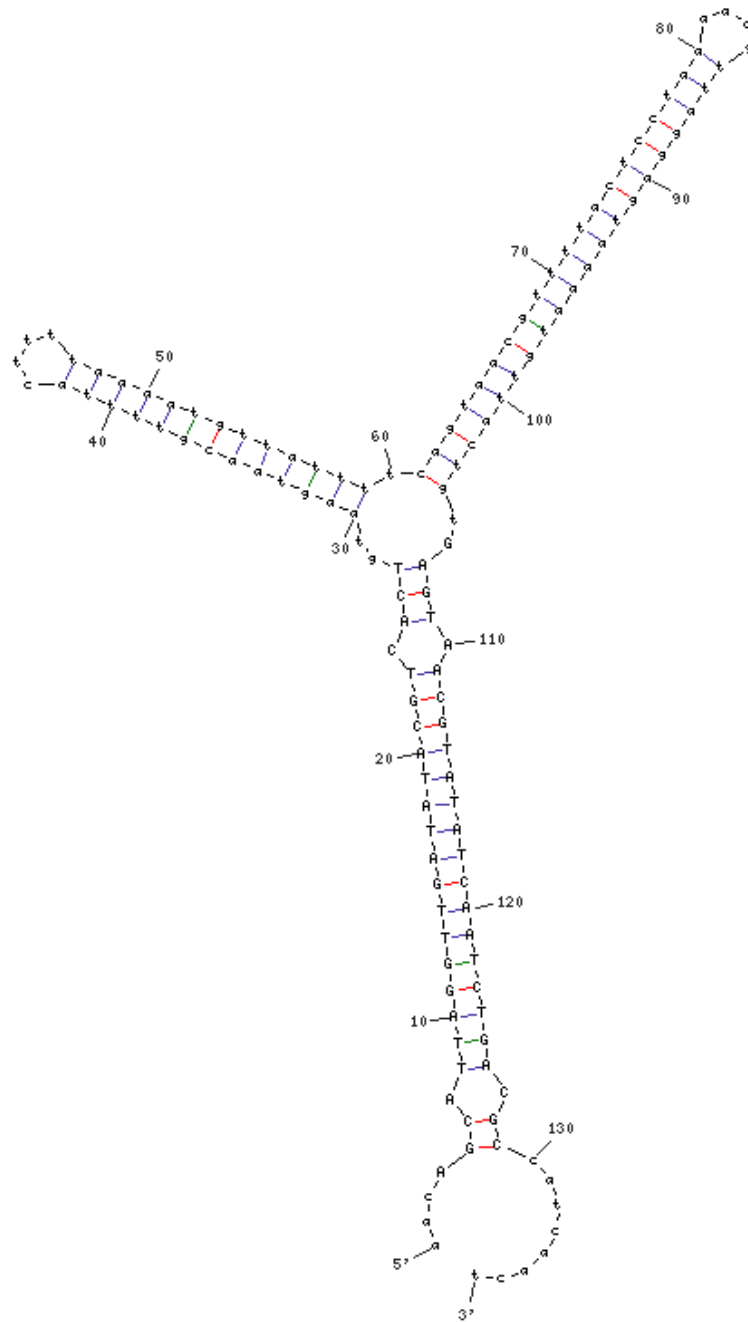

$$\Delta G = -62.2 \text{ kcal/mol}$$

**PC-3**

Output of `sir_graph ( )`  
by D. Stewart and M. Zuker

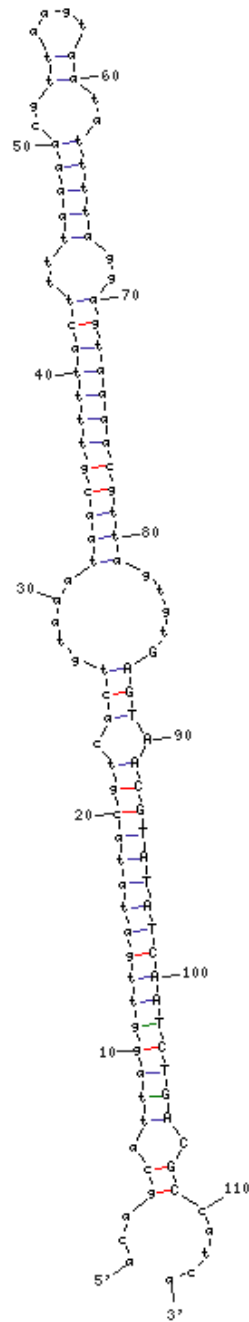

$dG = -45.9 \text{ kcal/mol}$

**PC-4**









Output of `sir_graph ( )`  
by D. Stewart and M. Zuker

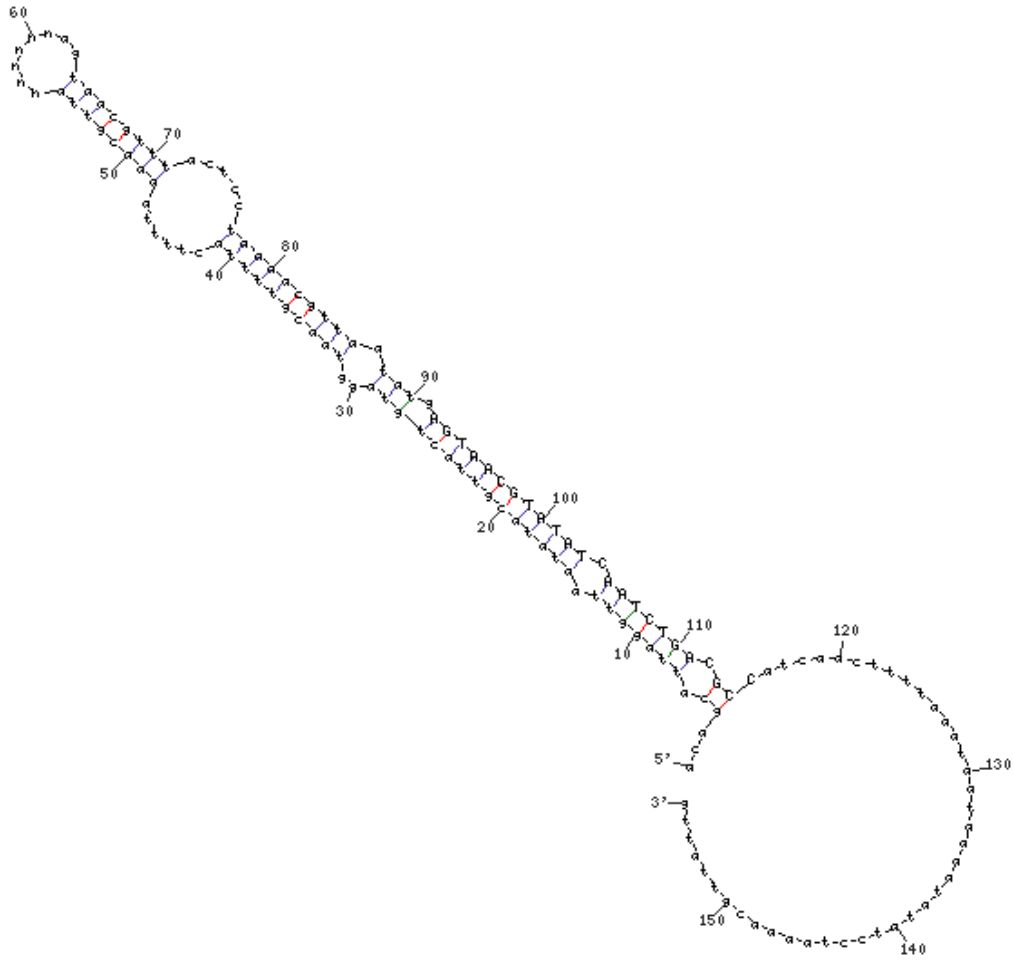

$$\Delta G = -39.6 \text{ kcal/mol PC-8}$$

**PC-8**

Output of `sir_graph ( )`  
by D. Stewart and M. Zuker

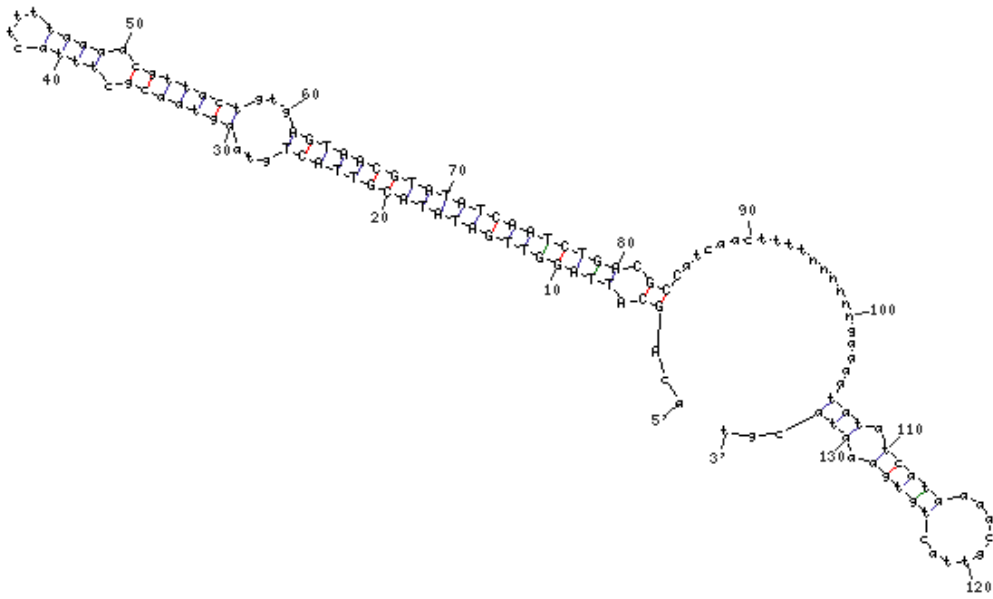

$$\Delta G = -41.3 \text{ kcal/mol}$$

**PC-9**

Output of `sir_graph ( )`  
by D. Stewart and M. Zuker

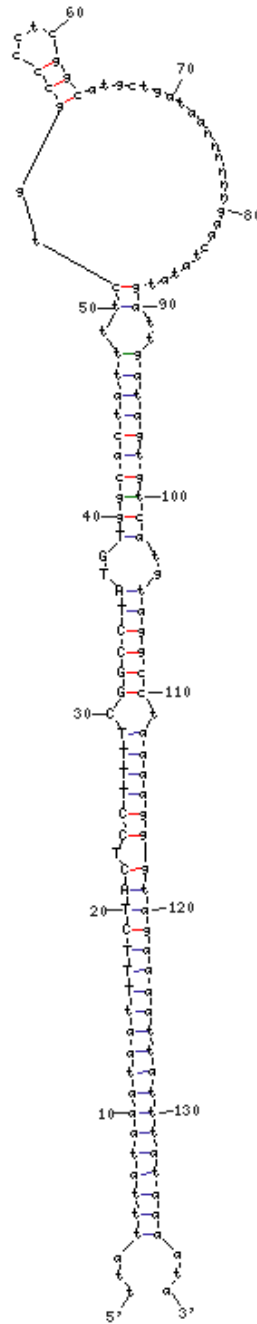

$$\Delta G = -57.8 \text{ kcal/mol PC-10}$$

**PC-10**

Output of `sir_graph ( )`  
by D. Stewart and M. Zuker

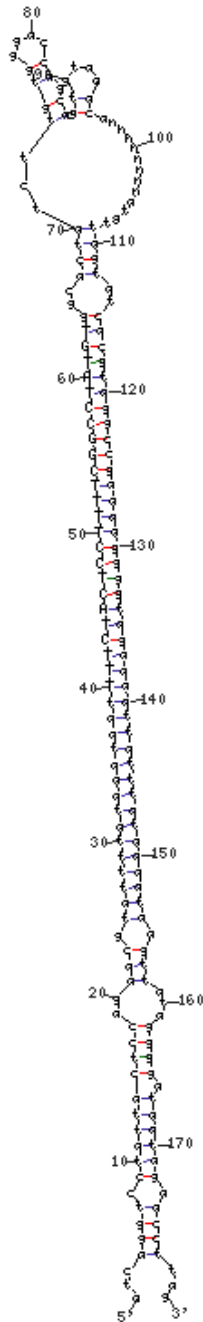

$dG = -83.1$  kcal/mol PC-11

**PC-11**

Output of `sir_graph ( )`  
by D. Stewart and M. Zuker

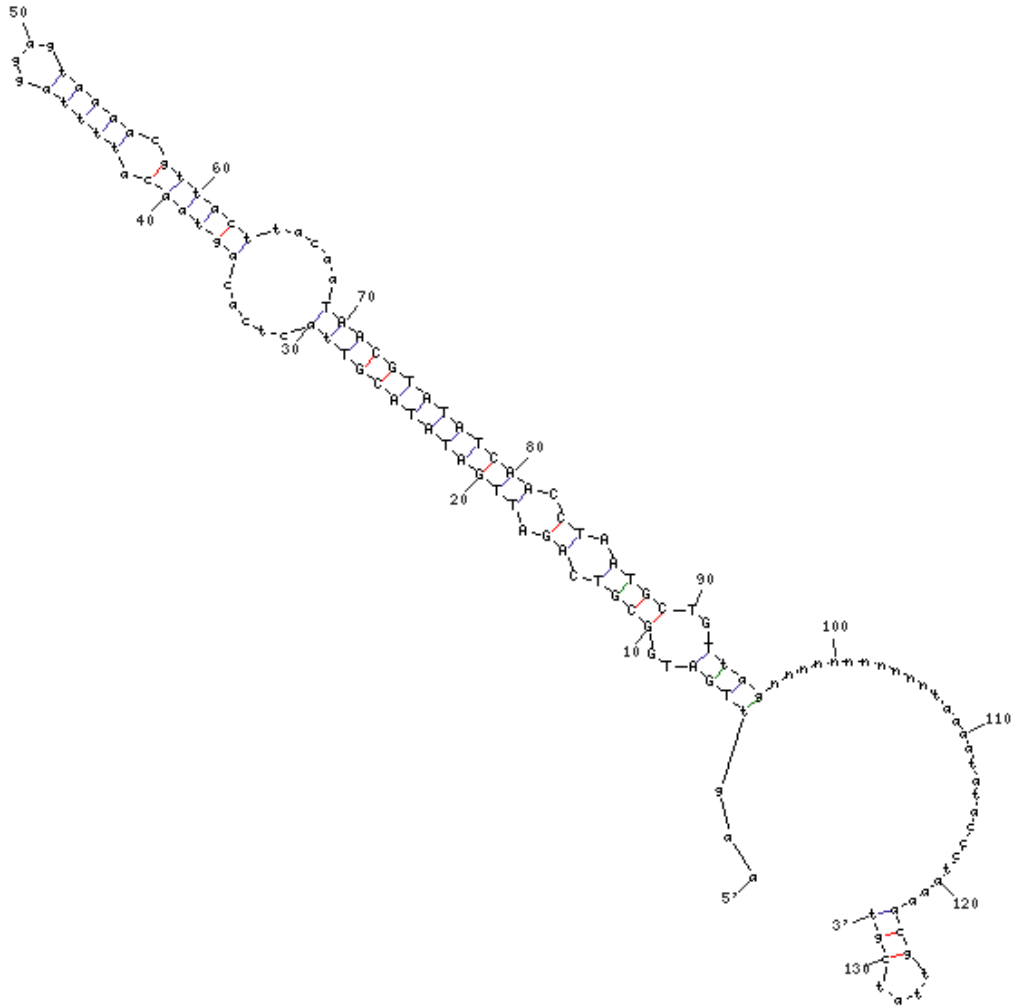

dG = -33<sub>1</sub>PC-12

**PC-12**

Output of `sir_graph ( )`  
by D. Stewart and M. Zuker

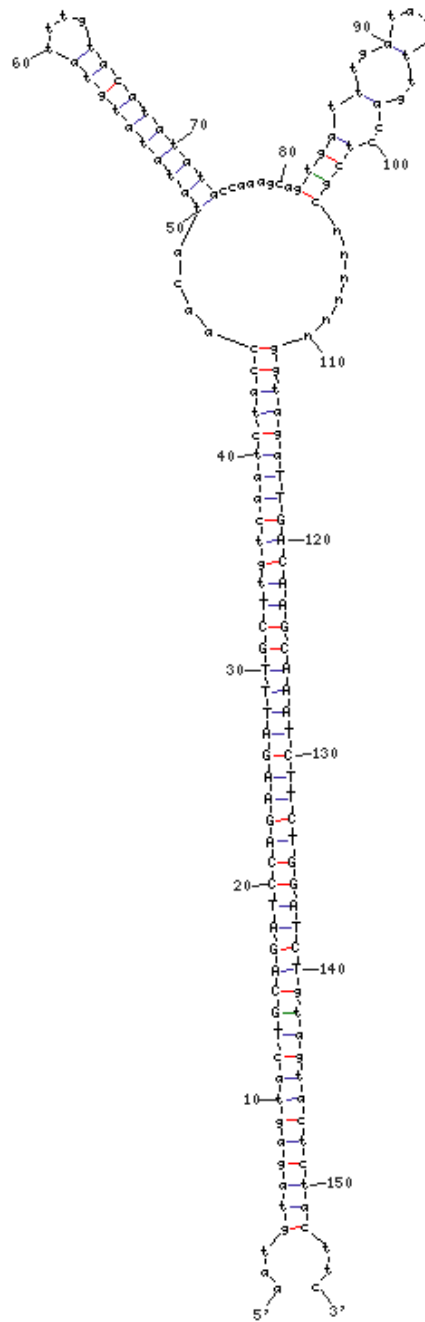

$dG = -86.9$  kcal/mol

**PC-13**

Output of `sir_graph ( )`  
by D. Stewart and M. Zuker

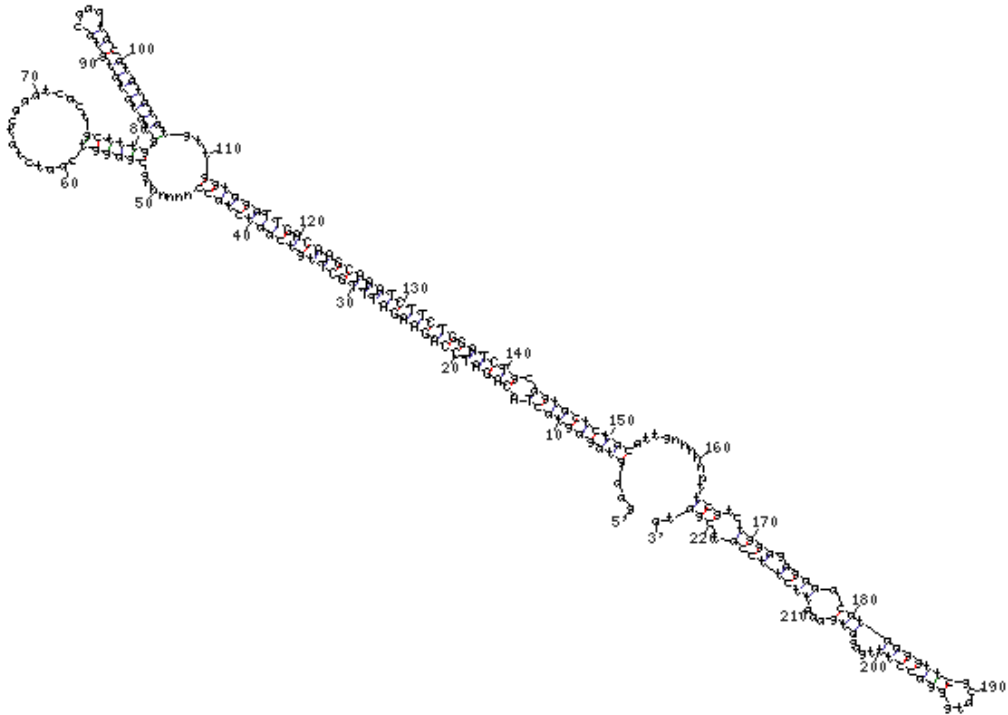

$dG = -98.1$  kcal/mol

**PC-14**



Output of `sir_graph ( )`  
by D. Stewart and M. Zuker

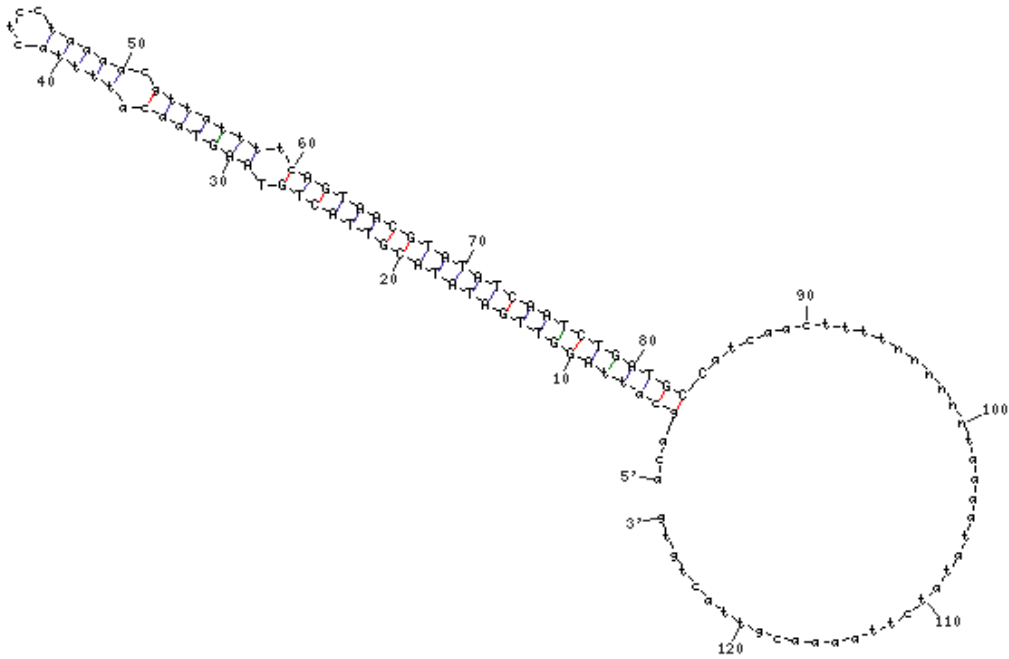

$$\Delta G = -44.2 \text{ kcal/mol PC-15}$$

**PC-15**

Output of `sir_graph ( )`  
by D. Stewart and M. Zuker

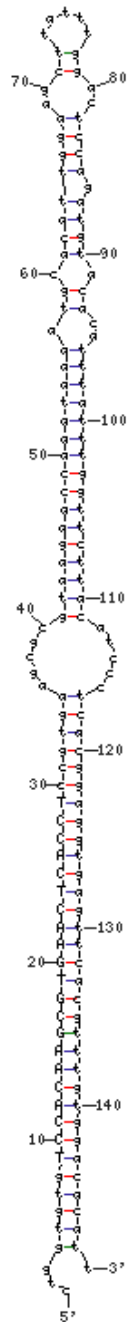

$dG = -92.5$  PC-16

**PC-16**

Output of `sir_graph ( )`  
by D. Stewart and M. Zuker

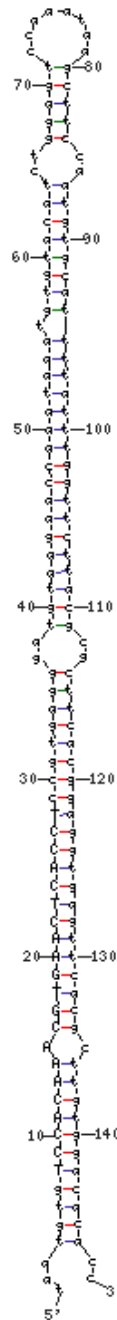

dG = -97.4 kcal/mol

**PC-17**

Output of `sir_graph ( )`  
by D. Stewart and M. Zuker

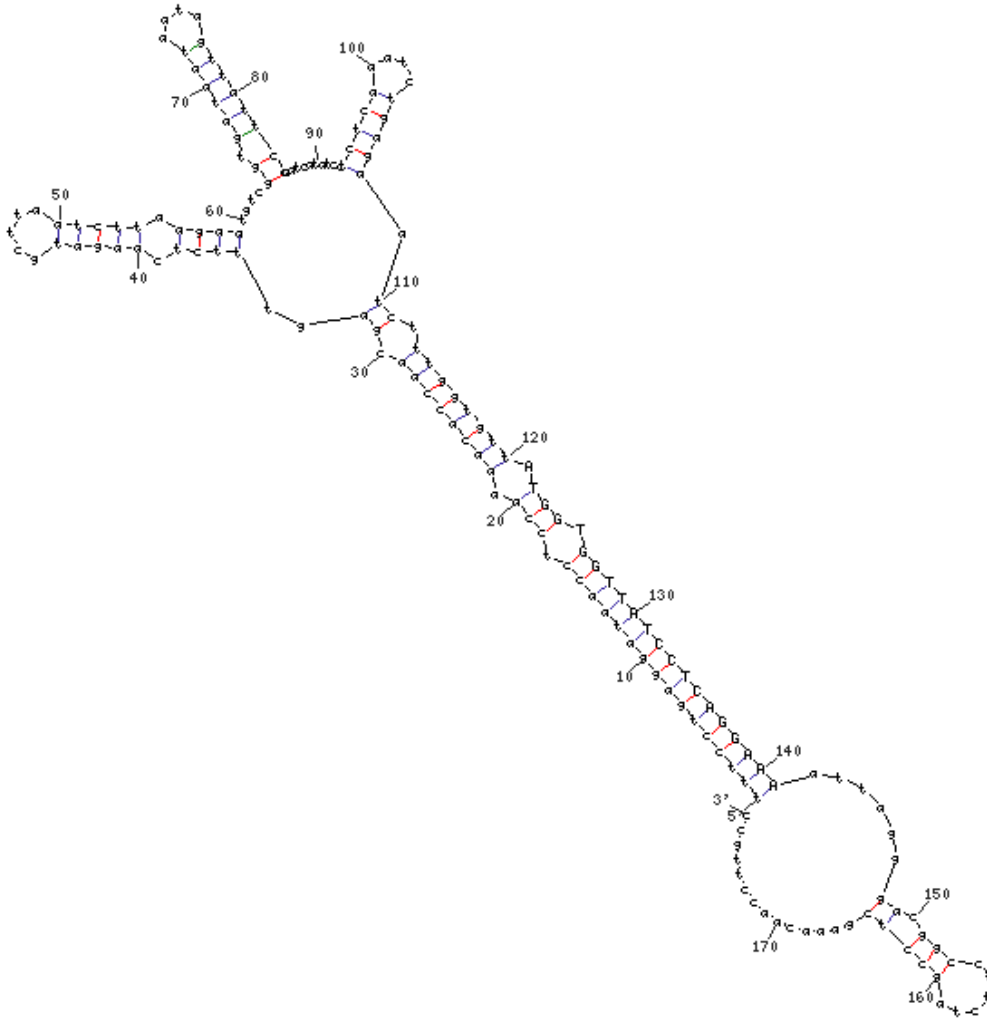

$$\Delta G = -64.3 \text{ kcal/mol PC-18}$$

**PC-18**

Output of `mir_graph ( )`  
by D. Stewart and M. Zuker

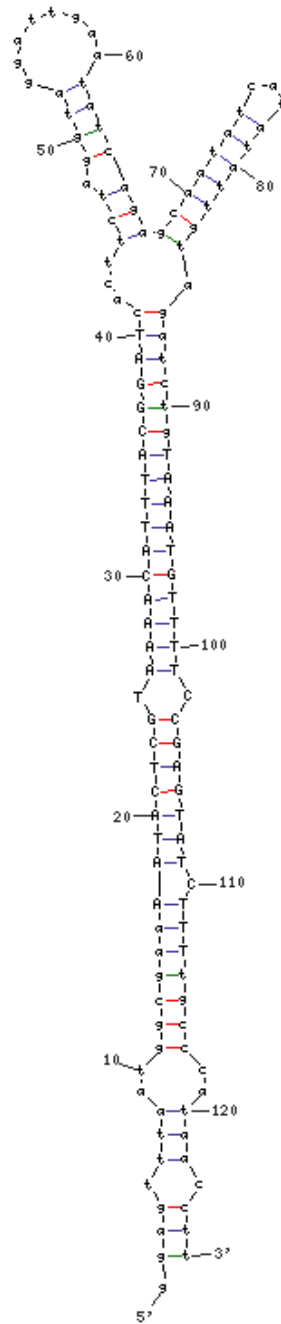

$dG = -45.5$  kcal/mol PC-19

**PC-19**

Output of `sir_graph ( )`  
by D. Stewart and M. Zuker

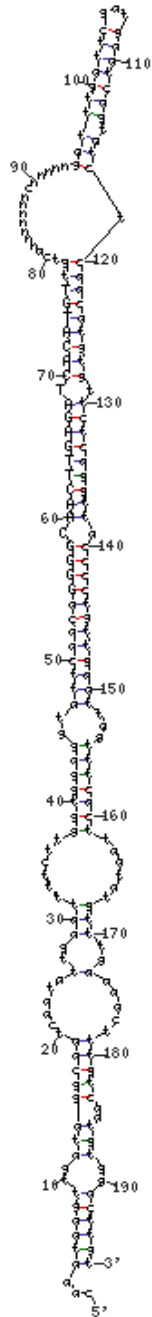

$dG = -68.6$  PC-20

**PC-20**

Output of `mir_graph ( )`  
by D. Stewart and M. Zuker

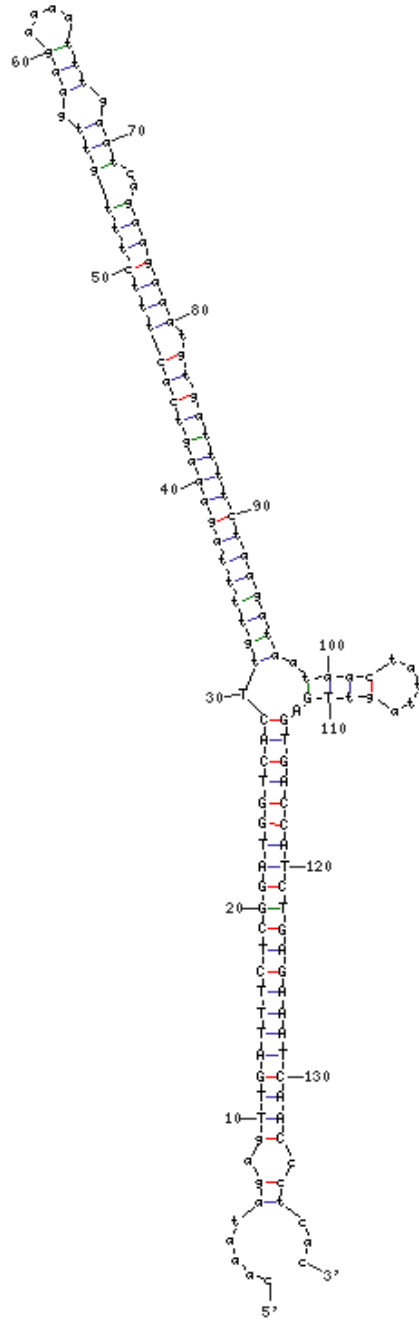

$dG = -60.8$  kcal/mol

**PC-21**

Output of `sir_graph ( )`  
by D. Stewart and M. Zuker

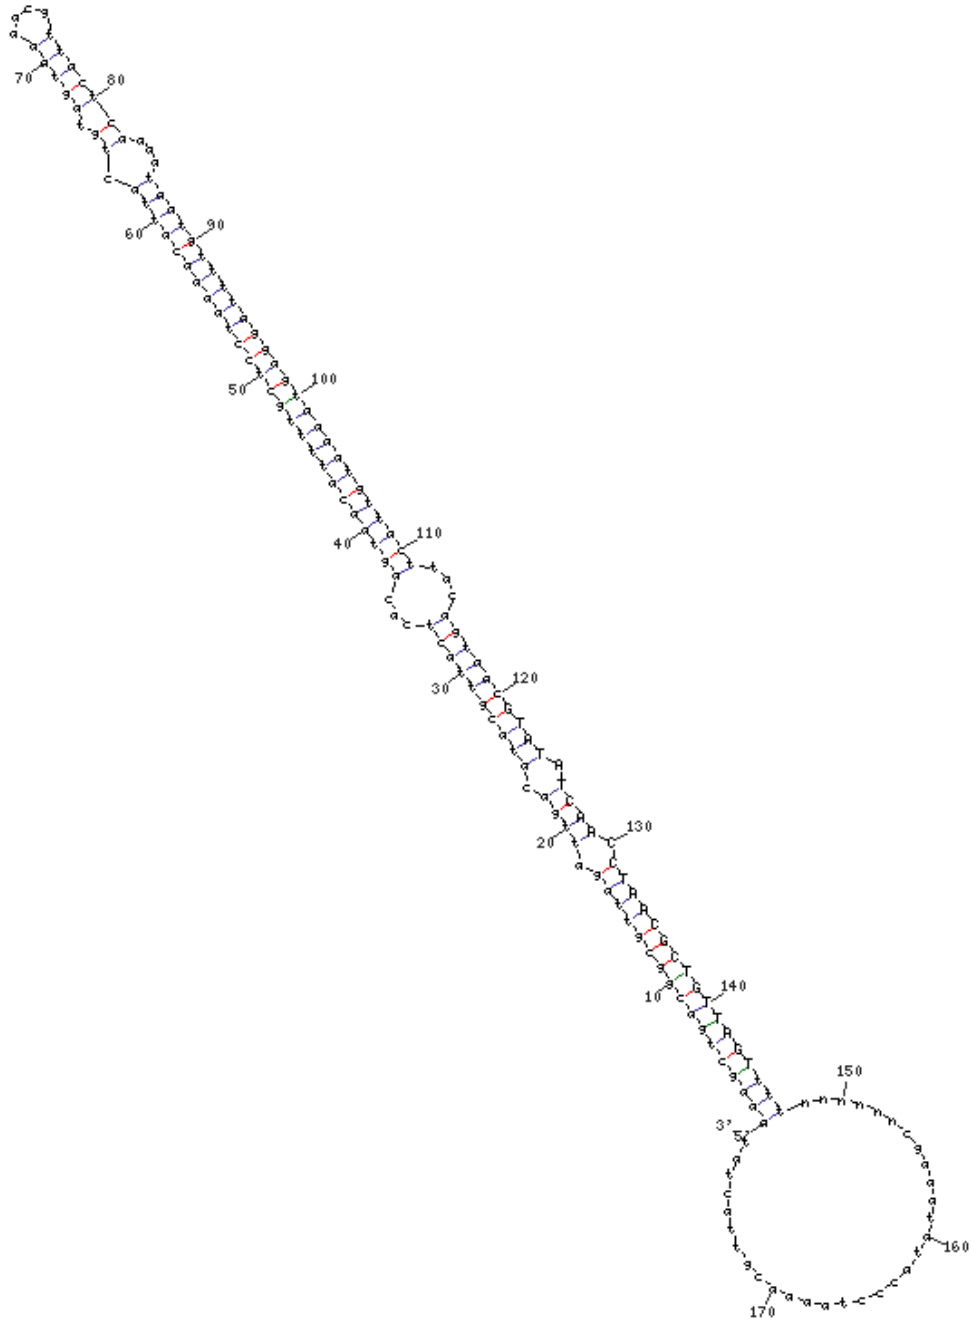

$$\Delta G = -79.1 \text{ kcal/mol PC-22}$$

**PC-22**



Output of `sir_graph ( )`  
by D. Stewart and M. Zuker

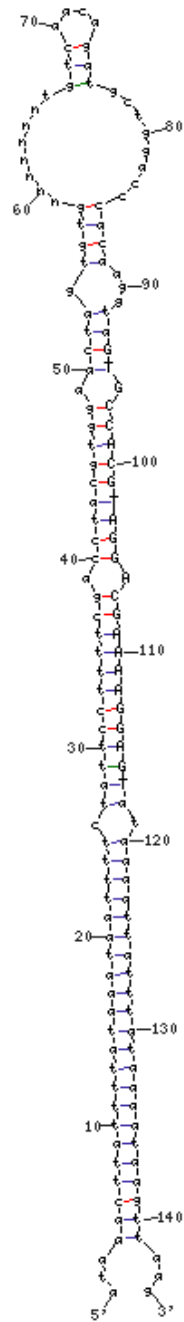

dG = -62.14 PC-23

**PC-23**

Output of `sir_graph ( )`  
by D. Stewart and M. Zuker

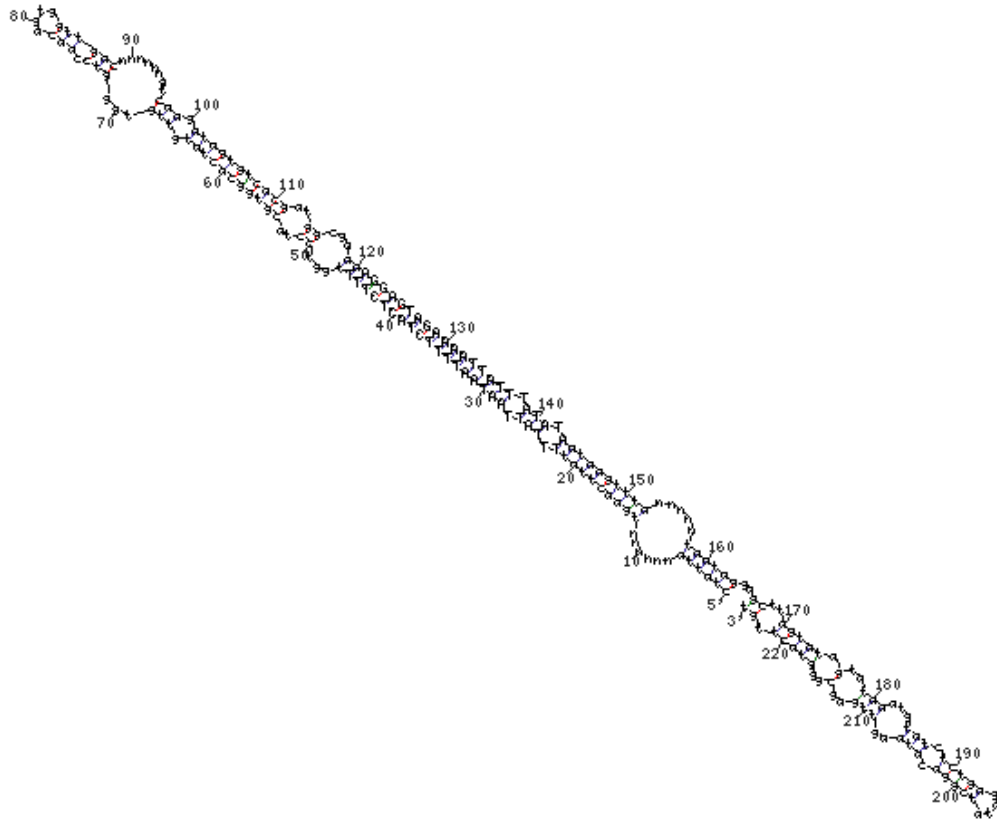

$$\Delta G = -72.3 \text{ kcal/mol}$$

**PC-24**

Output of `sir_graph ( )`  
by D. Stewart and M. Zuker

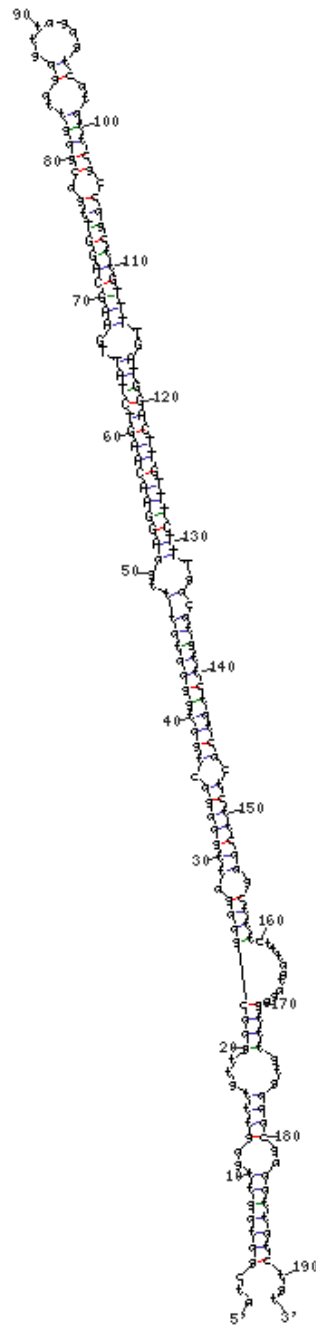

$dG = -77.1$  kcal/mol PC-25

**PC-25**

Output of `sir_graph ( )`  
by D. Stewart and M. Zuker

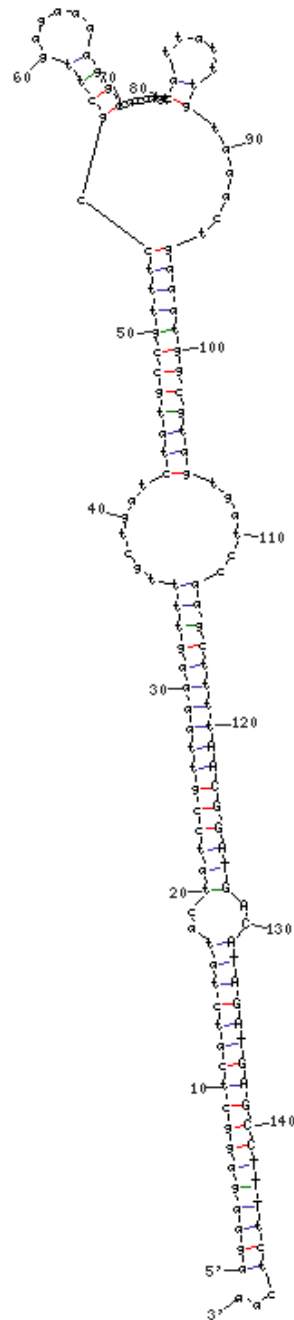

$dG = -65.5$  kcal/mol PC-26

**PC-26**

Output of `sir_graph ( )`  
by D. Stewart and M. Zuker

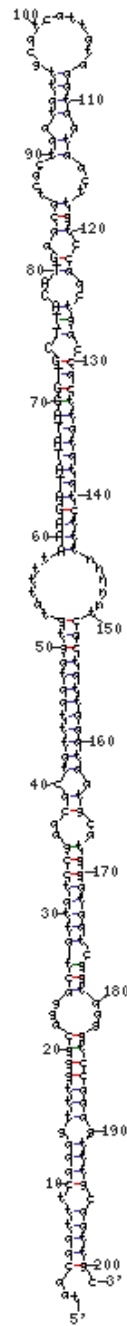

dG = -62.9 kcal/mol

**PC-27**

Output of `sir_graph ( )`  
by D. Stewart and M. Zuker

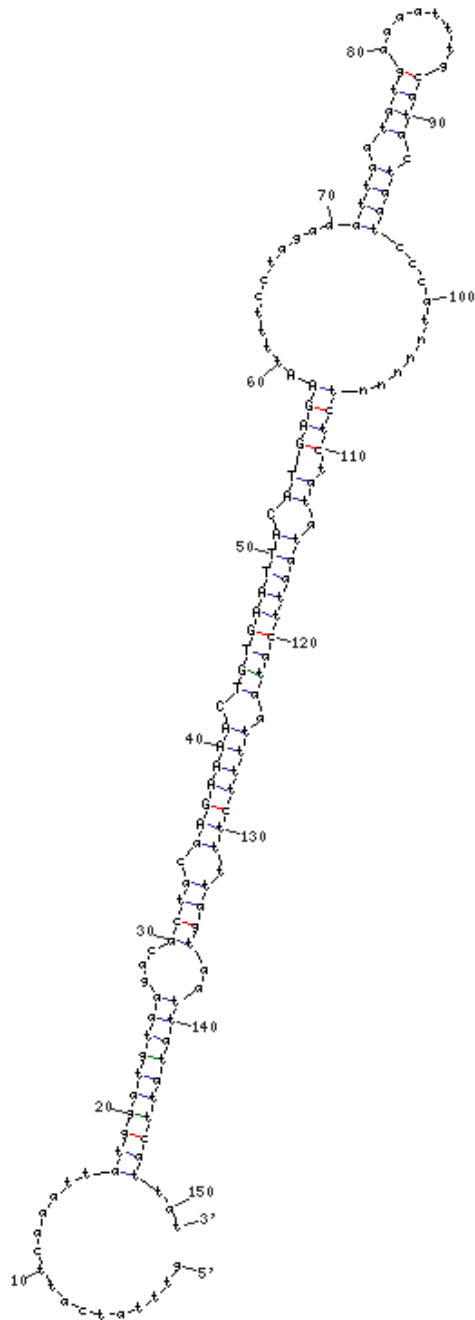

dG = -31.8 kcal/mol

**PC-28**

Output of `sir_graph ( )`  
by D. Stewart and M. Zuker

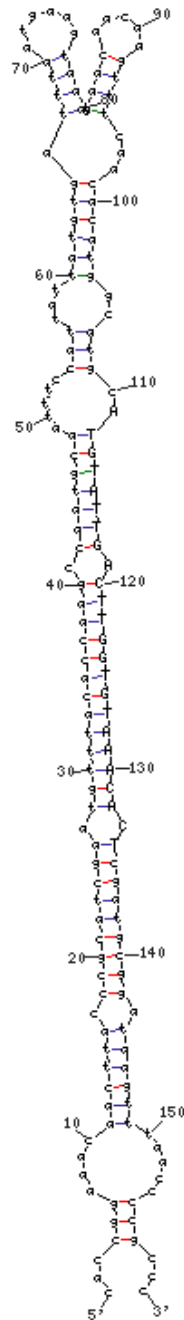

dG = -57.2 kcal/mol

**PC-29**

Output of `mir_graph ( )`  
by D. Stewart and M. Zuker

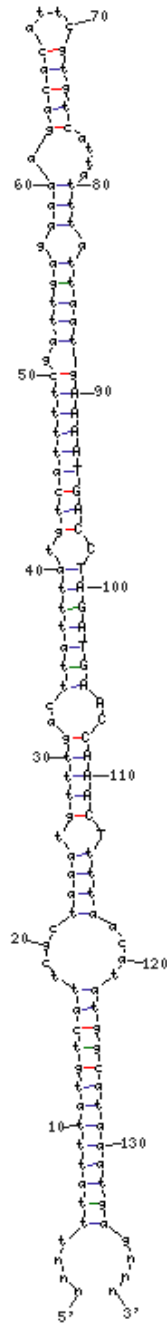

$$\Delta G = -42.5 \text{ kcal/mol PC-30}$$

**PC-30**



Output of `sir_graph ( )`  
by D. Stewart and M. Zuker

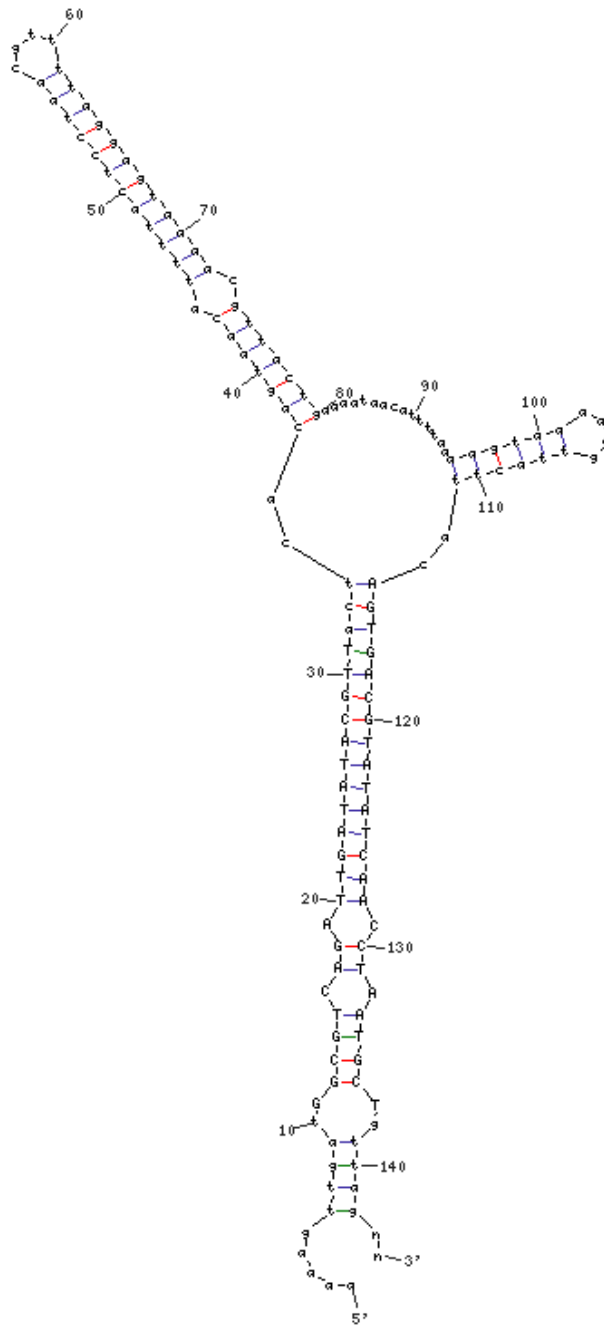

dG = -56.6 kcal/mol

**PC-31**

Output of `sir_graph ( )`  
by D. Stewart and M. Zuker

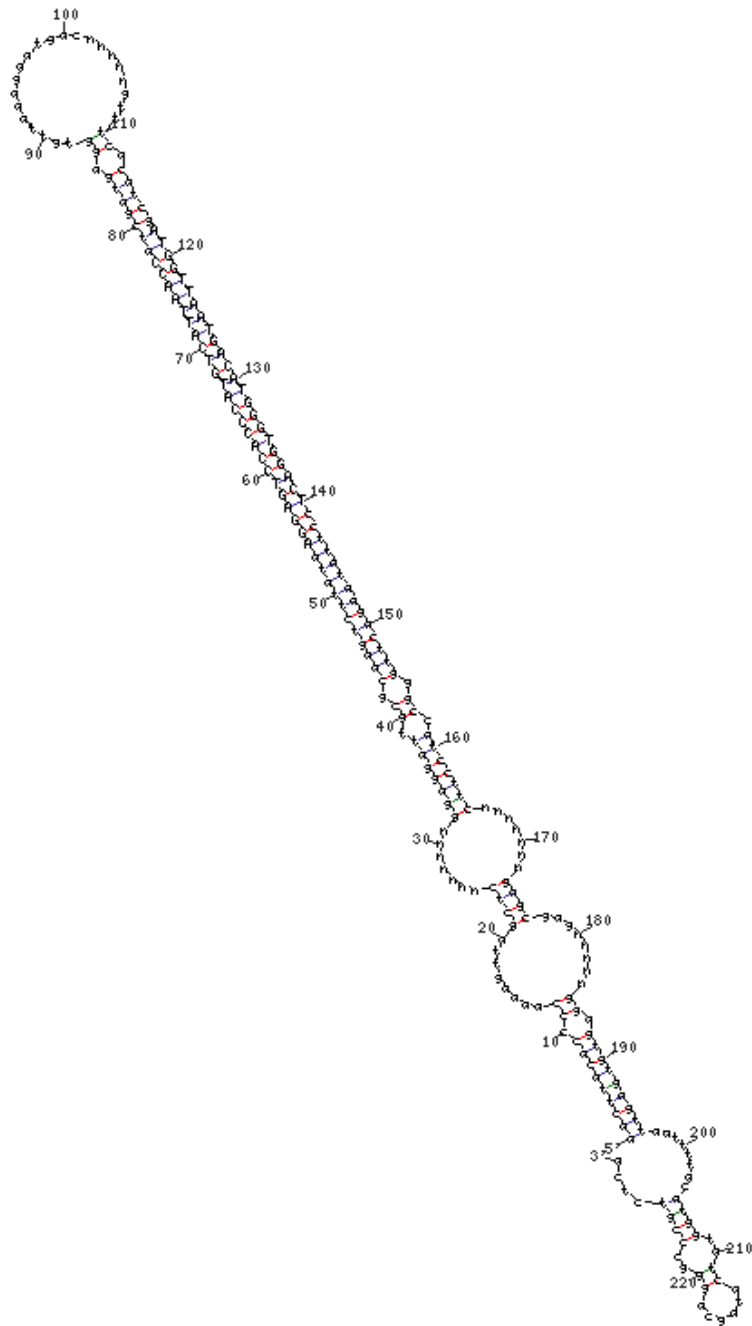

$$dG = -115.3 \text{ PC-32}$$

**PC-32**

Output of `mir_graph ( )`  
by D. Stewart and M. Zuker

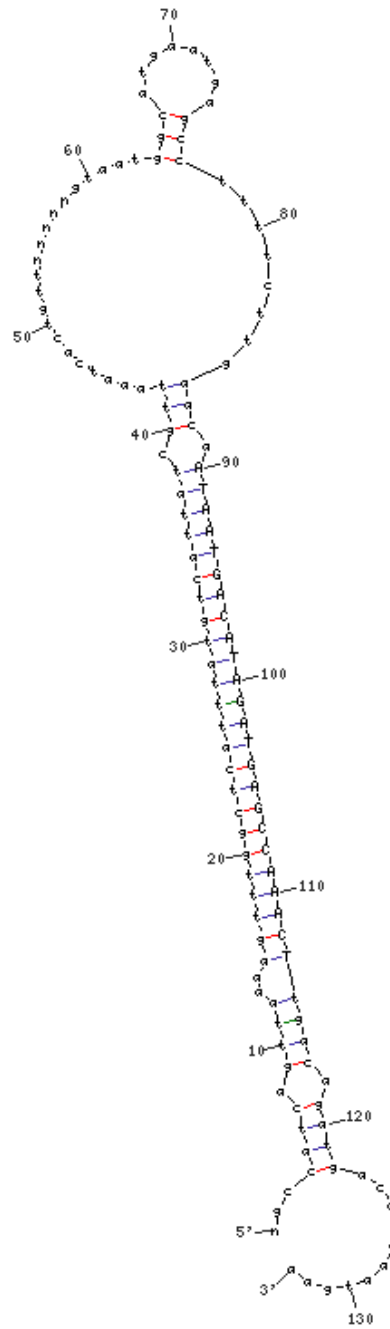

$$\Delta G = -45.9 \text{ kcal/mol}$$

**PC-33**

Output of `mir_graph ( )`  
by D. Stewart and M. Zuker

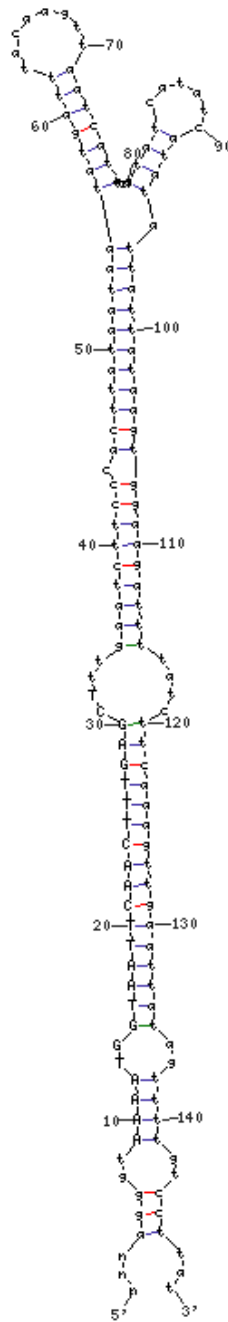

$dG = -51.6$  kcal/mol PC-34

**PC-34**

Output of `sir_graph ( )`  
by D. Stewart and M. Zuker

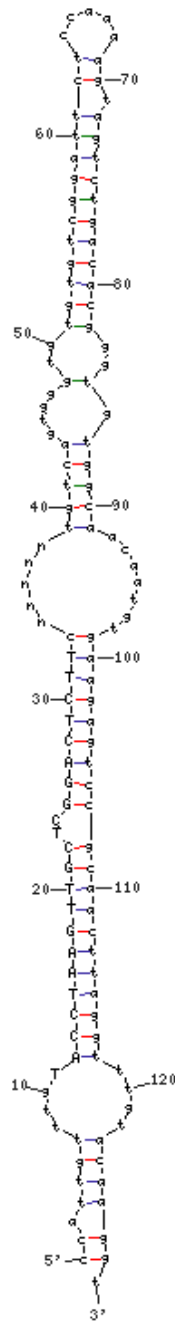

$dG = -53.2$  kcal/mol PC-35

**PC-35**

Output of `sir_graph ( )`  
by D. Stewart and M. Zuker

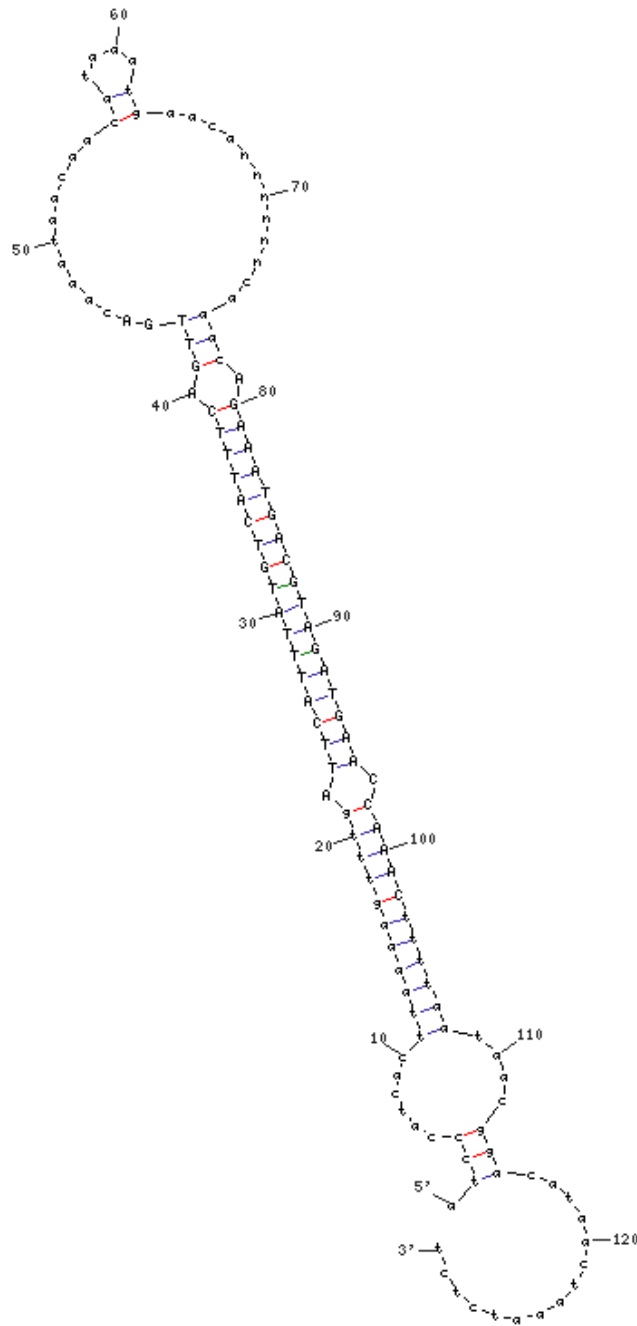

$$\Delta G = -33.9 \text{ kcal/mol PC-36}$$

**PC-36**

Output of `sir_graph ( )`  
by D. Stewart and M. Zuker

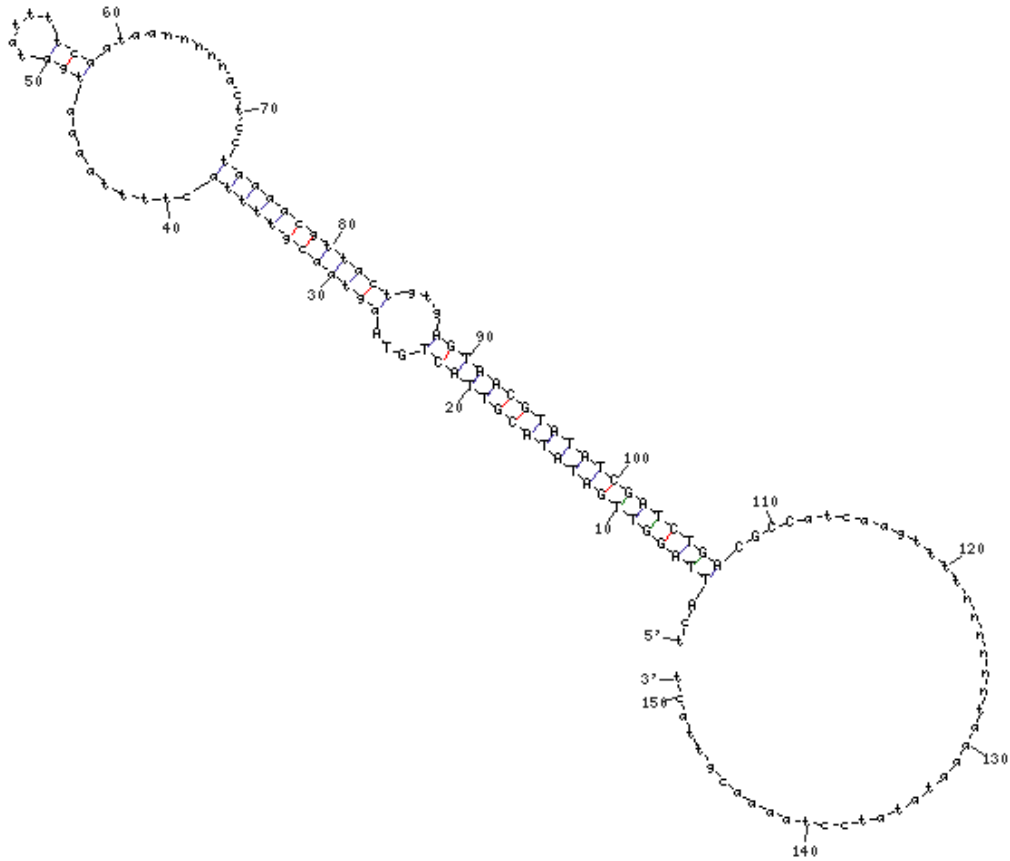

$$\Delta G = -38.3 \text{ kcal/mol PC-37}$$

**PC-37**

Output of `sir_graph ( )`  
by D. Stewart and M. Zuker

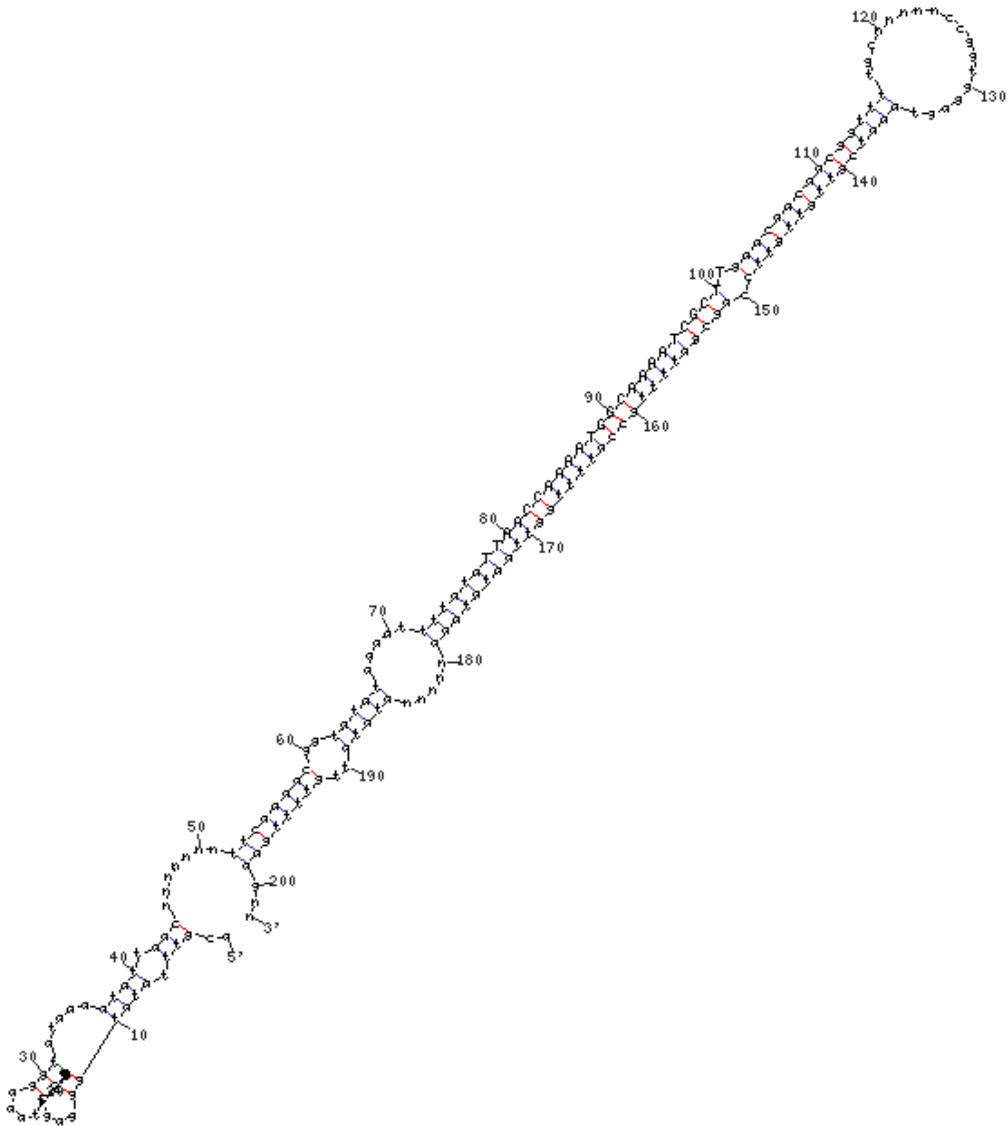

$$\Delta G = -79.5 \text{ kcal/mol PC-38}$$

**PC-38**



Output of `mir_graph ( )`  
by D. Stewart and M. Zuker

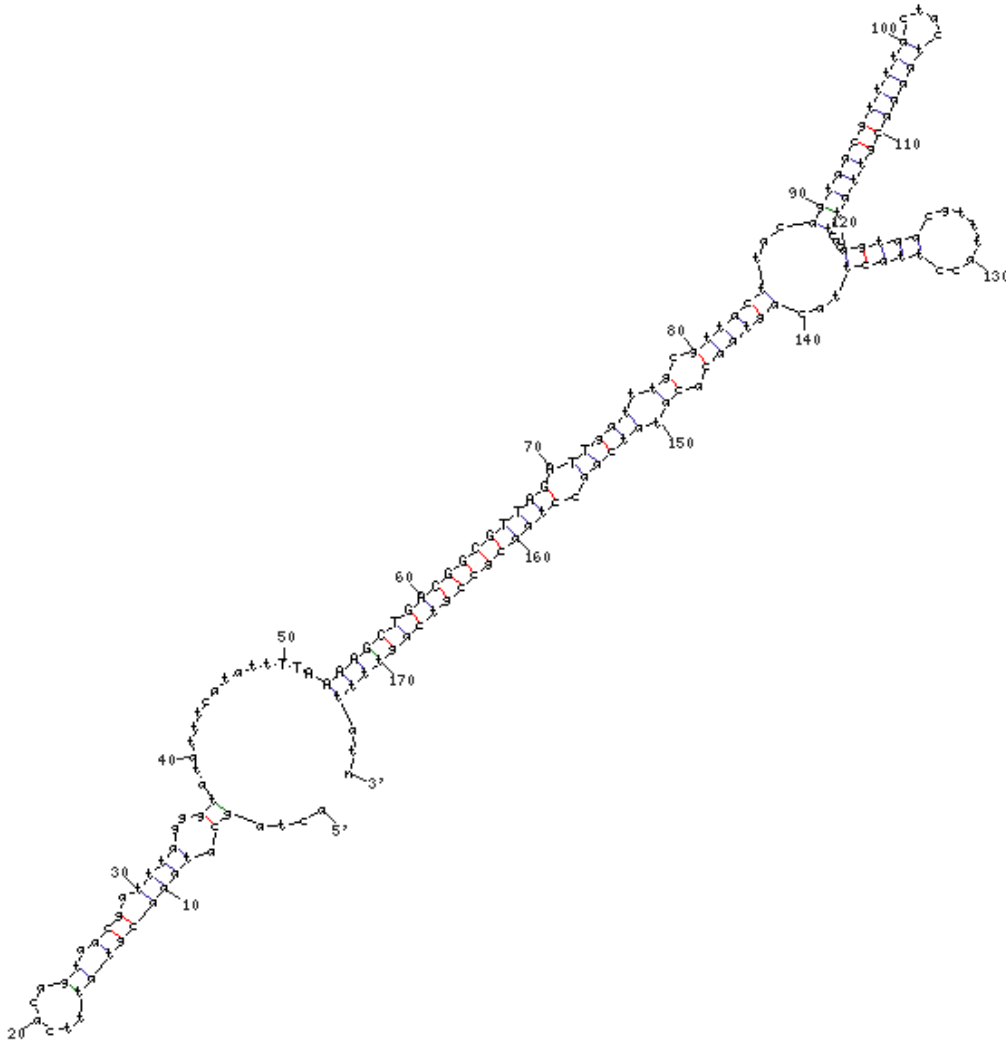

$$\Delta G = -55.7 \text{ kcal/mol}$$

**PC-39**

Output of `sir_graph ( )`  
by D. Stewart and M. Zuker

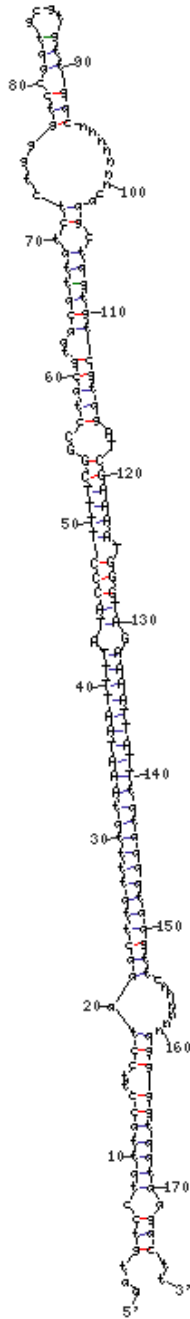

$dG = -57.9$  kcal/mol PC-40

**PC-40**

Output of `sir_graph ( )`  
by D. Stewart and M. Zuker

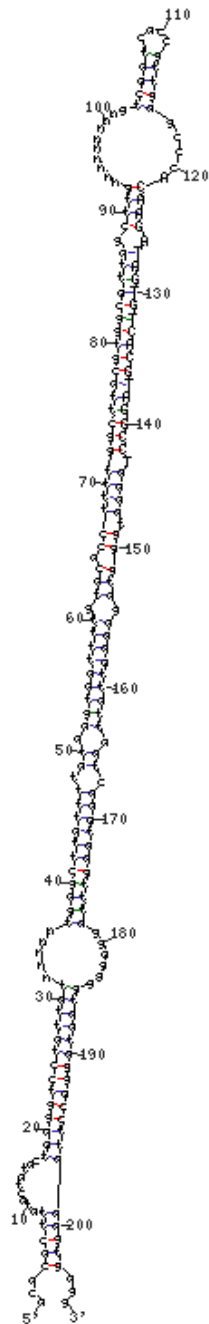

$dG = -75.5$  kcal/mol PC-41

**PC-41**



Output of `mir_graph ( )`  
by D. Stewart and M. Zuker

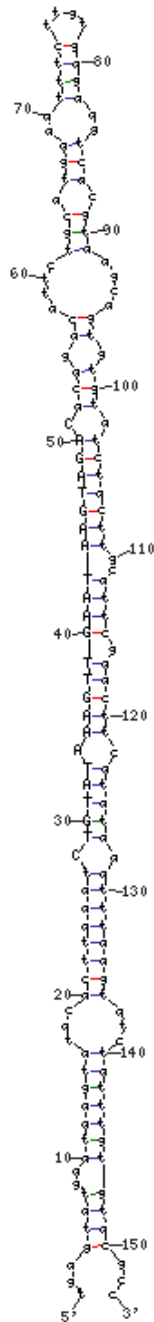

dG = -41.1 kcal/mol PC-43

**PC-43**

Output of `sir_graph ( )`  
by D. Stewart and M. Zuker

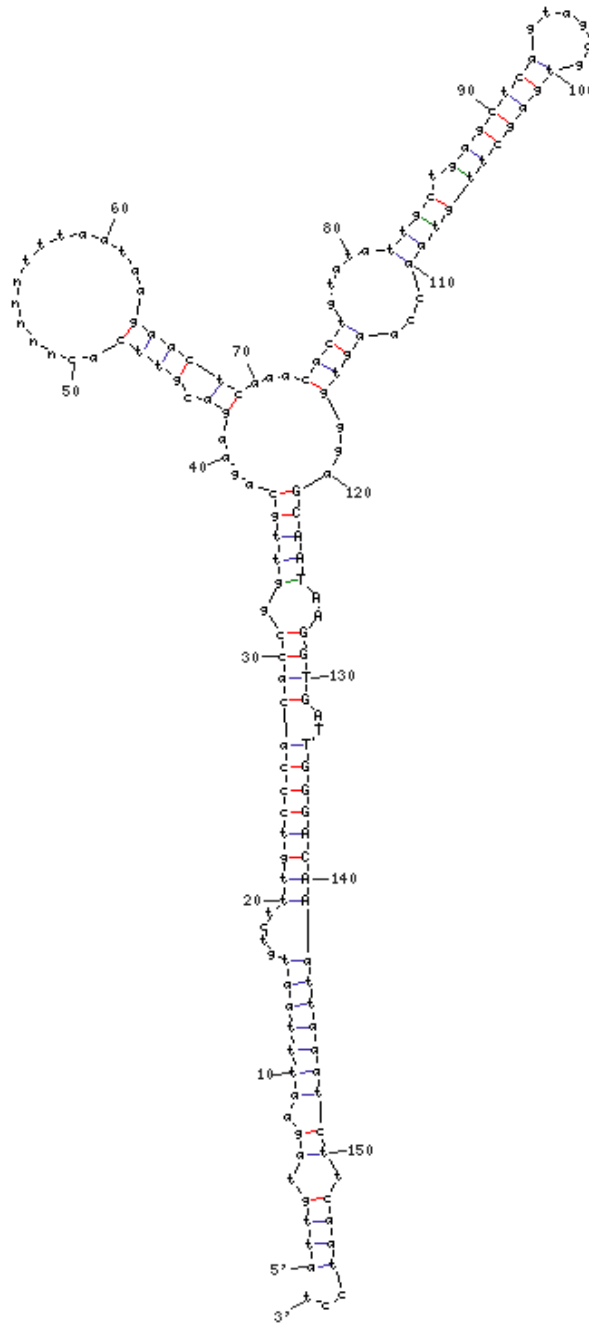

dG = -45<sub>1</sub>PC-44

**PC-44**

Output of `mir_graph ( )`  
by D. Stewart and M. Zuker

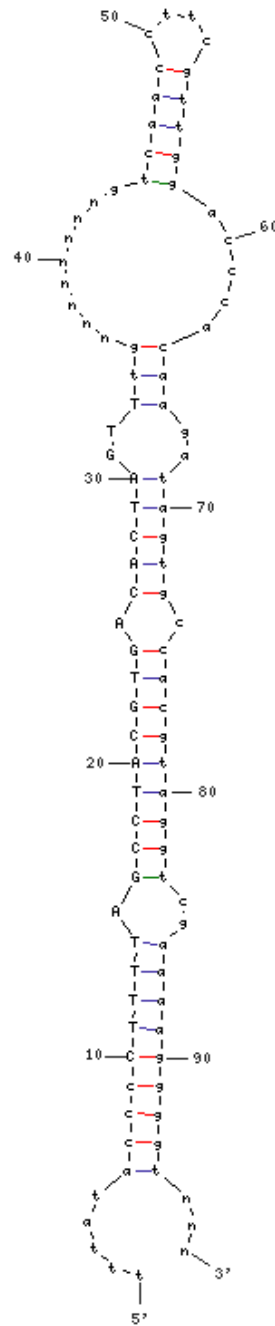

$$\Delta G = -37.5 \text{ kcal/mol PC-45}$$

**PC-45**

Output of `sir_graph ( )`  
by D. Stewart and M. Zuker

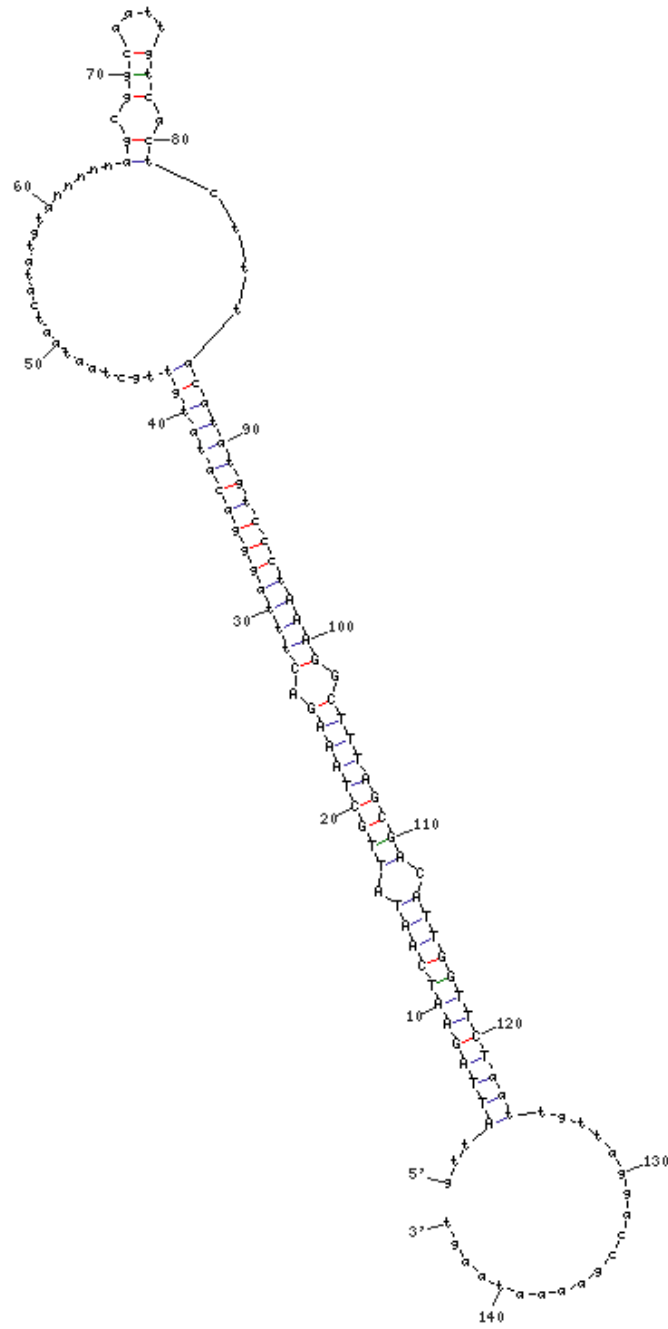

$$\Delta G = -51.5 \text{ kcal/mol PC-46}$$

**PC-46**



Output of `mir_graph ( )`  
by D. Stewart and M. Zuker

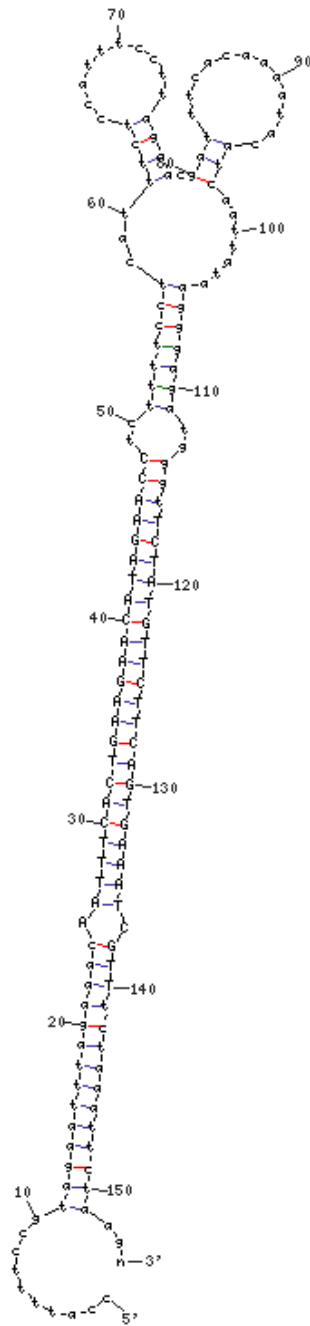

$dG = -62.1$  PC-47

**PC-47**

Output of `sir_graph ( )`  
by D. Stewart and M. Zuker

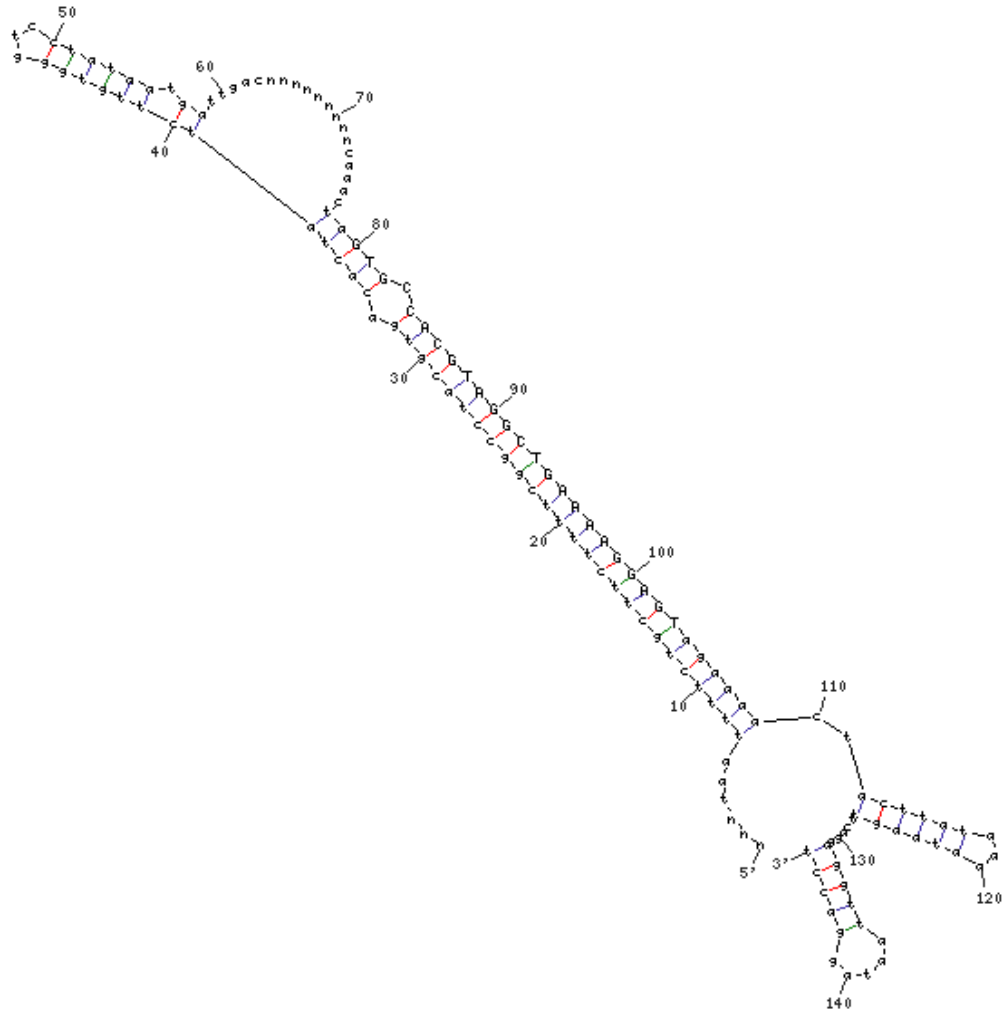

$$\Delta G = -52.7 \text{ kcal/mol}$$

**PC-48**

Output of `sir_graph ( )`  
by D. Stewart and M. Zuker

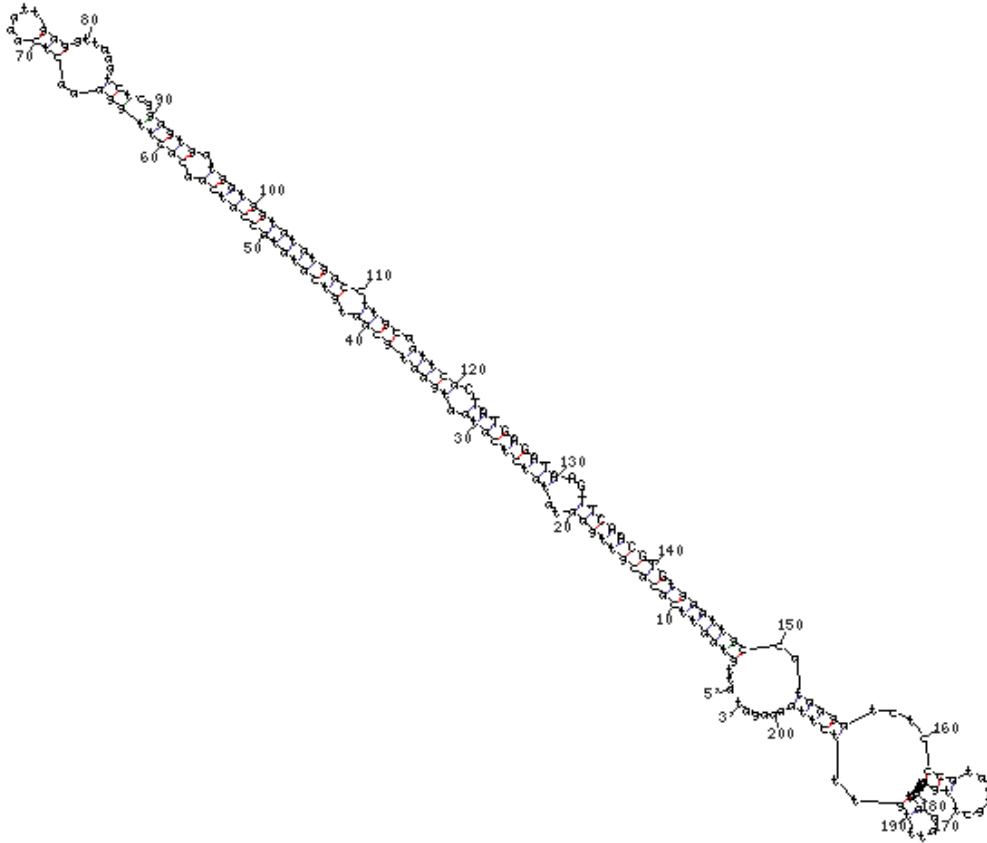

$dG = -81.1$  PC-49

**PC-49**

Output of `sir_graph ( )`  
by D. Stewart and M. Zuker

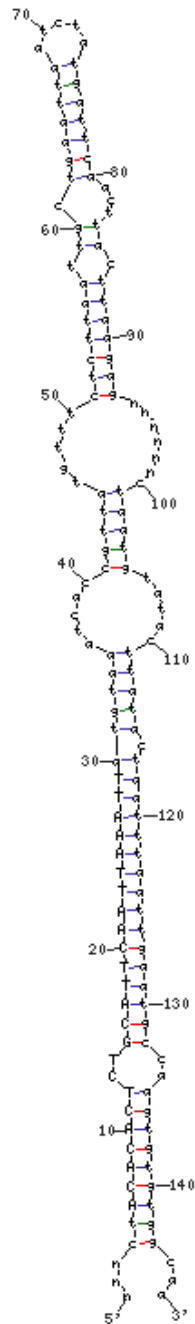

$dG = -43.8$  kcal/mol PC-50

**PC-50**

Output of `mir_graph ( )`  
by D. Stewart and M. Zuker

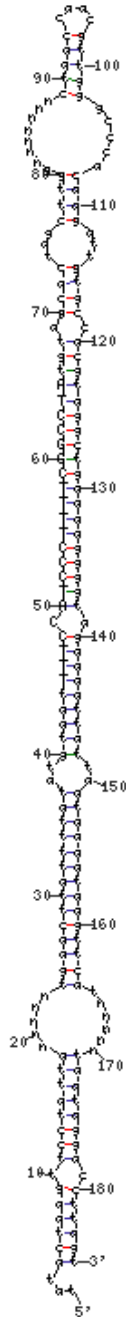

$dG = -85.5$  PC-51

**PC-51**

Output of `mir_graph ( )`  
by D. Stewart and M. Zuker

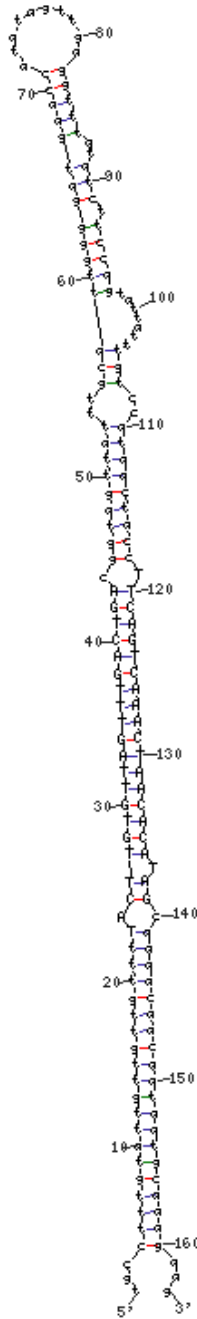

$dG = -74.8$  kcal/mol

**PC-52**

Output of `sir_graph ( )`  
by D. Stewart and M. Zuker

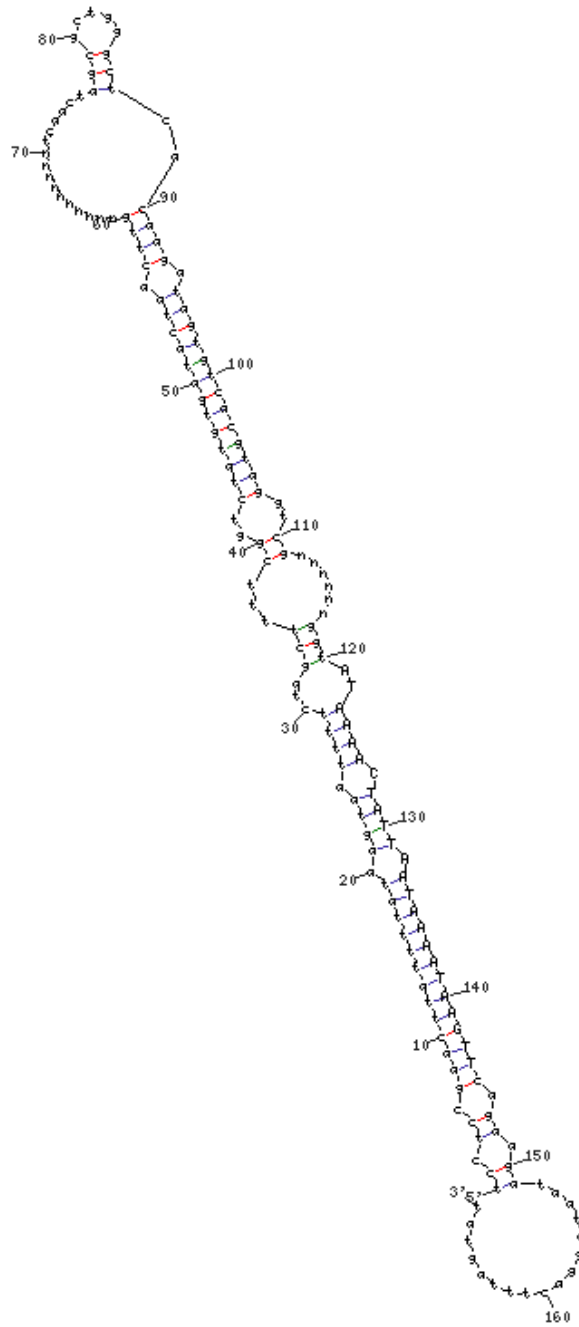

$$\Delta G = -45.1 \text{ kcal/mol PC-53}$$

**PC-53**





Output of `sir_graph ( )`  
by D. Stewart and M. Zuker

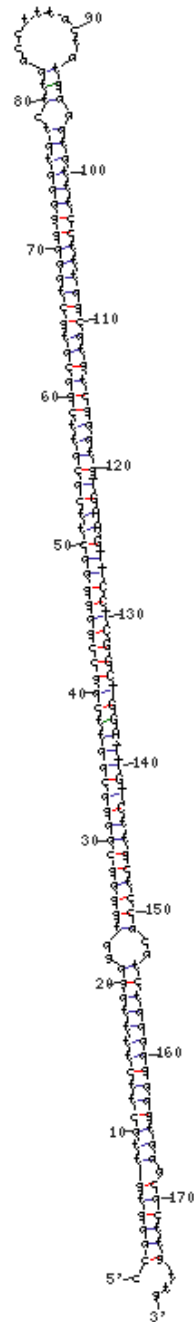

$dG = -129$  PC-55

**PC-55**

Output of `sir_graph ( )`  
by D. Stewart and M. Zuker

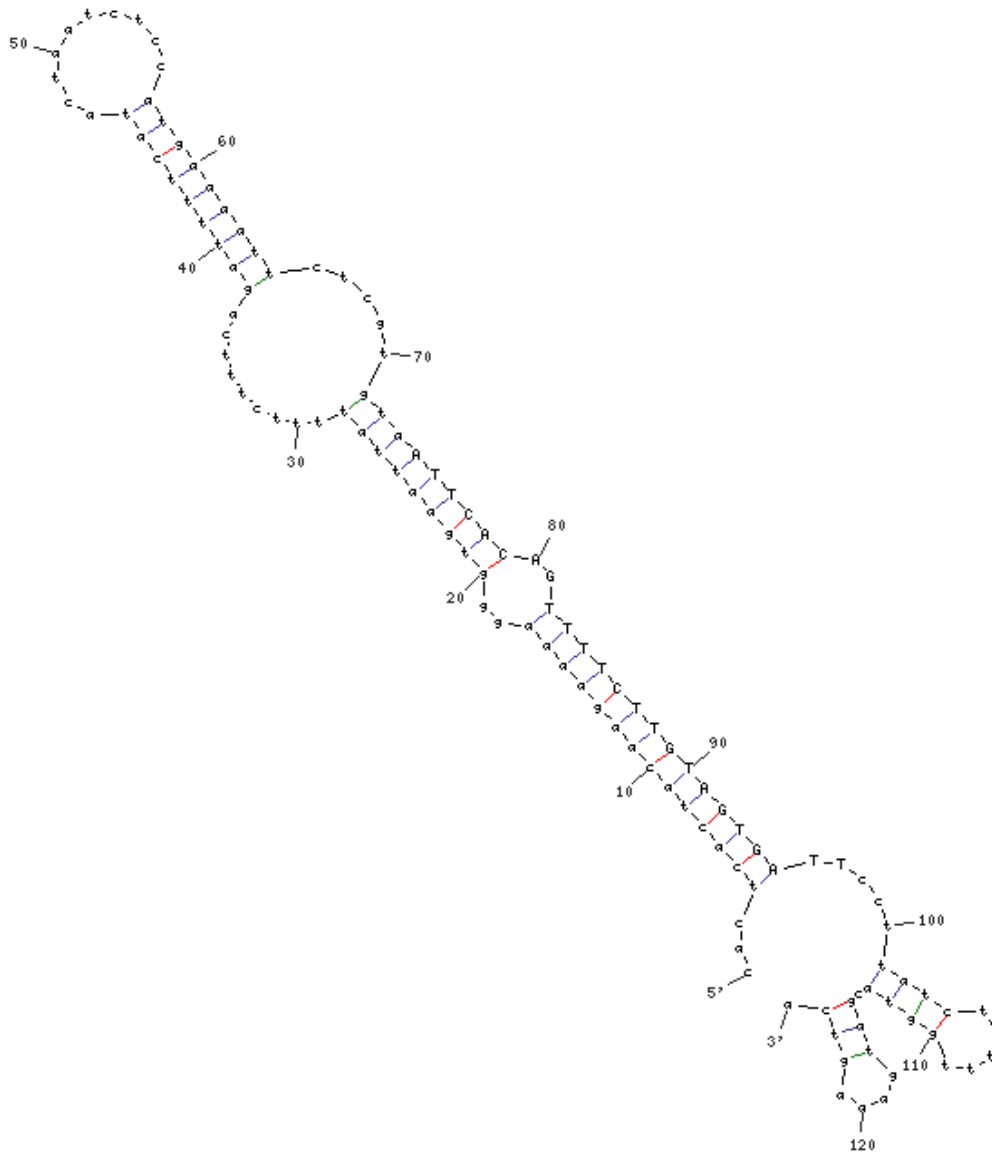

$$\Delta G = -37.2 \text{ kcal/mol}$$

**PC-56**



Output of `sir_graph ( )`  
by D. Stewart and M. Zuker

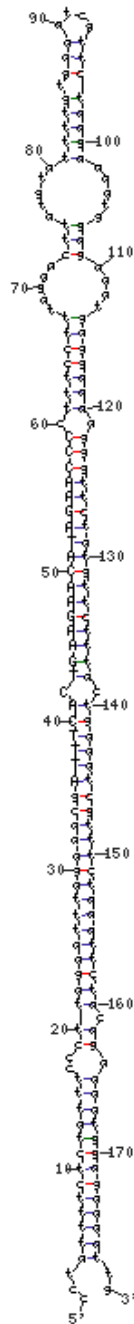

dG = -80.4 kcal/mol PC-58

**PC-58**

Output of `sir_graph ( )`  
by D. Stewart and M. Zuker

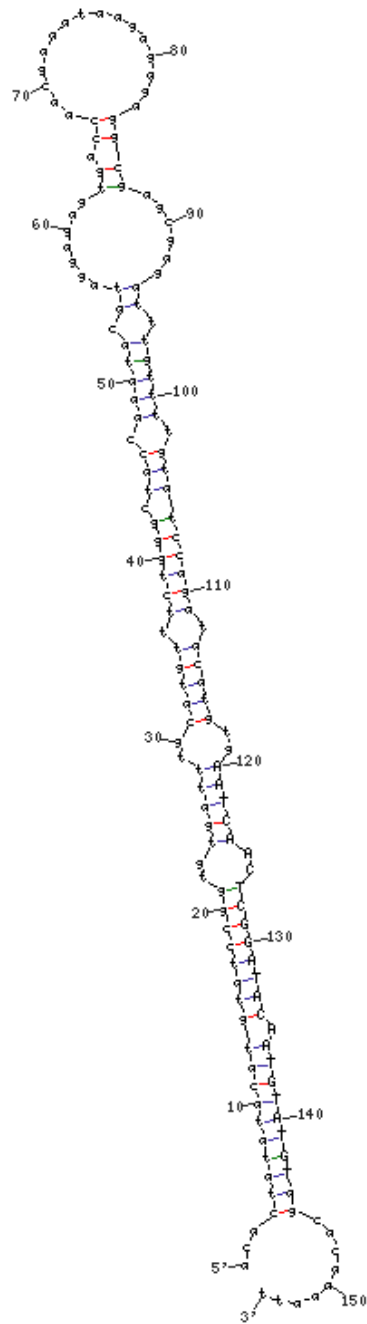

$dG = -52.7$  kcal/mol

**PC-59**

Output of `mir_graph ( )`  
by D. Stewart and M. Zuker

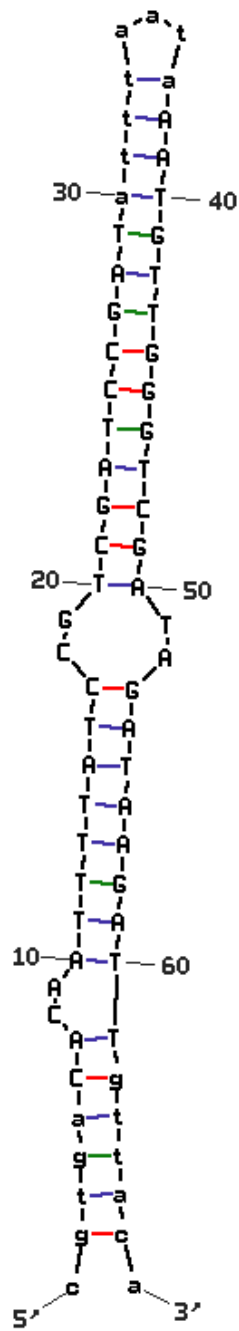

dG = -31.1 kcal/mol PC-60

**PC-60**

Output of `sir_graph ( )`  
by D. Stewart and M. Zuker

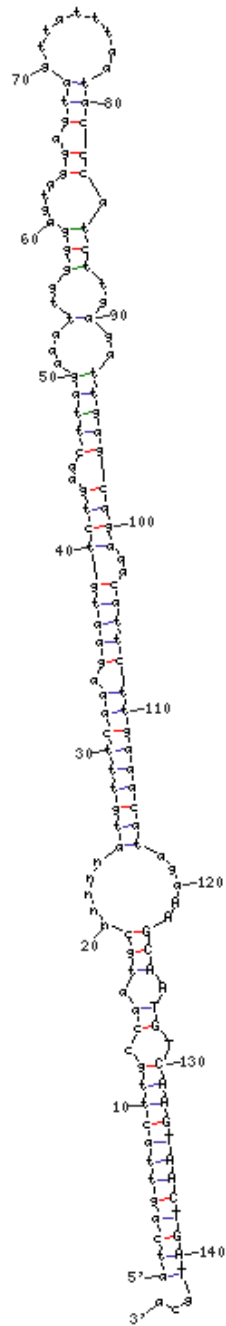

$dG = -46.4$  kcal/mol

**PC-61**





Output of `sir_graph ( )`  
by D. Stewart and M. Zuker

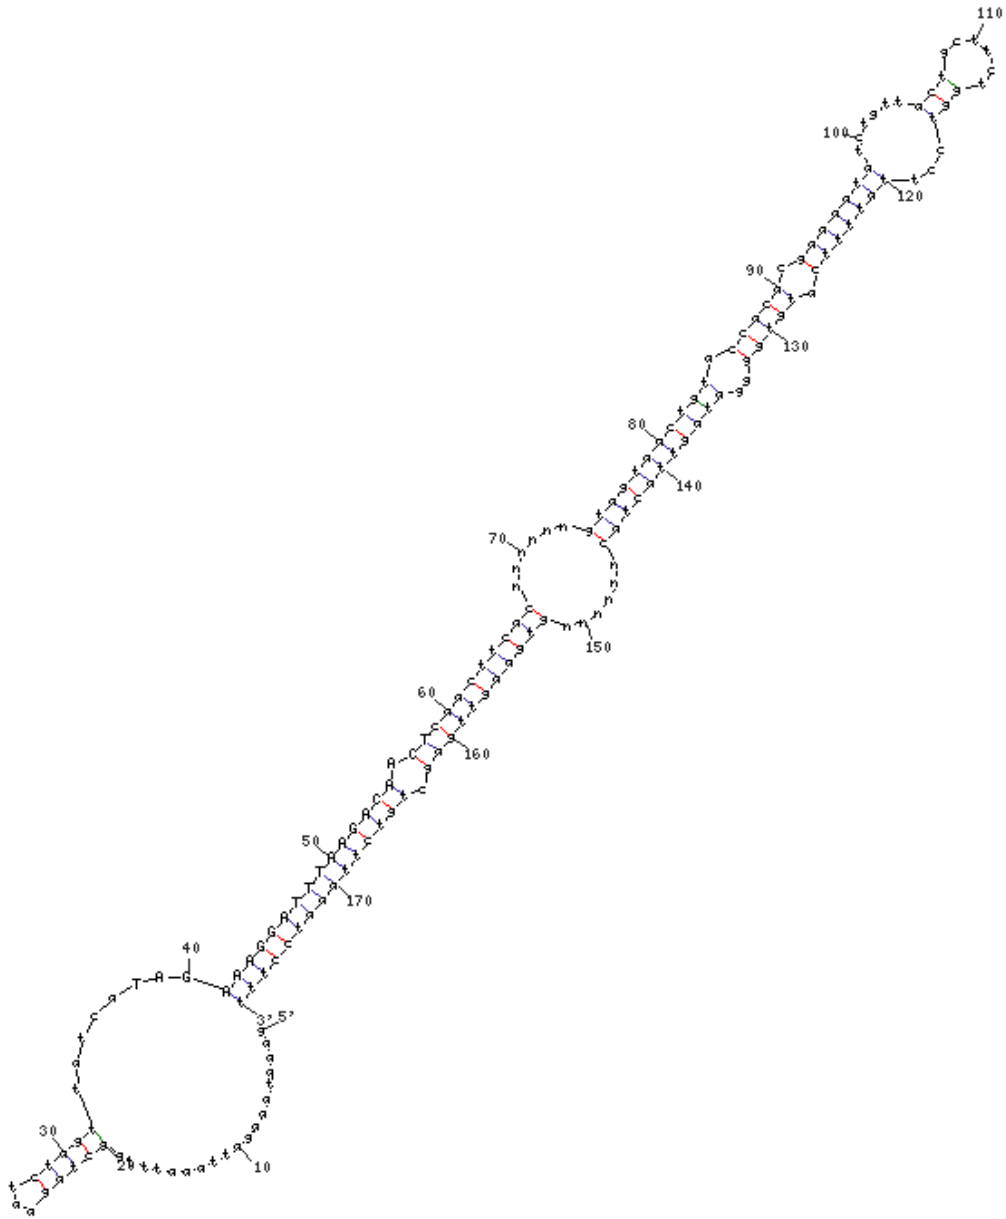

$$\Delta G = -68.5 \text{ kcal/mol PC-63}$$

**PC-63**



Output of `sir_graph ( )`  
by D. Stewart and M. Zuker

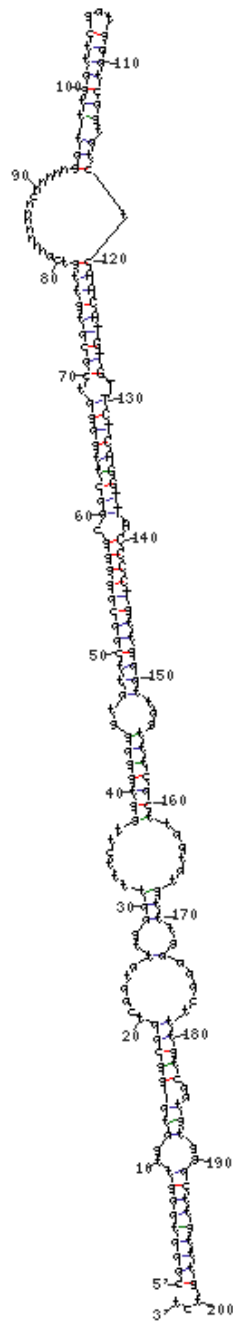

$dG = -73.3$  kcal/mol PC-65

**PC-65**

Output of `sir_graph ( )`  
by D. Stewart and M. Zuker

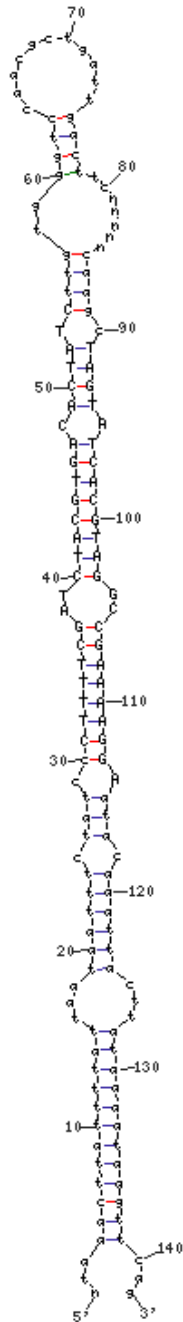

dG = -48.2 kcal/mol PC-66

**PC-66**

Output of `sir_graph ( )`  
by D. Stewart and M. Zuker

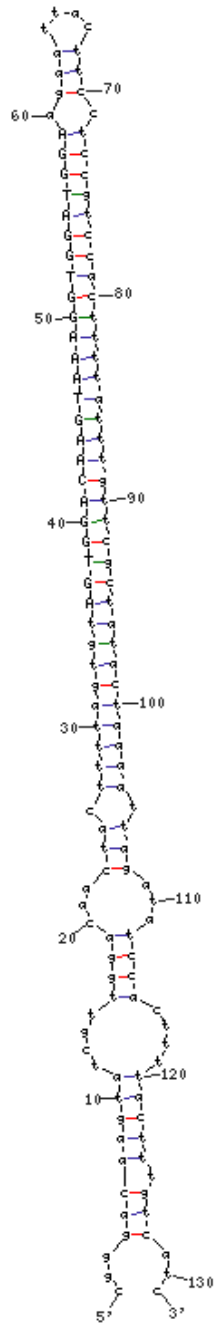

dG = -64.1 kcal/mol PC-67

**PC-67**

Output of `sir_graph ( )`  
by D. Stewart and M. Zuker

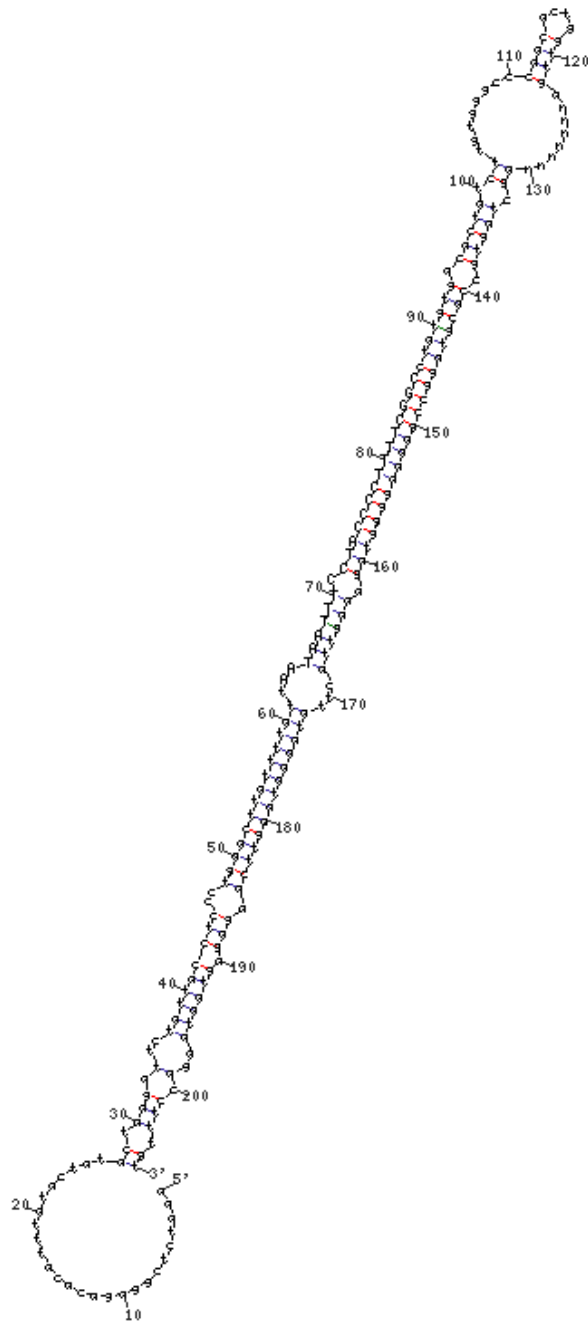

$$dG = -82.5 \text{ kcal/mol PC-68}$$

**PC-68**

Output of `sir_graph ( )`  
by D. Stewart and M. Zuker

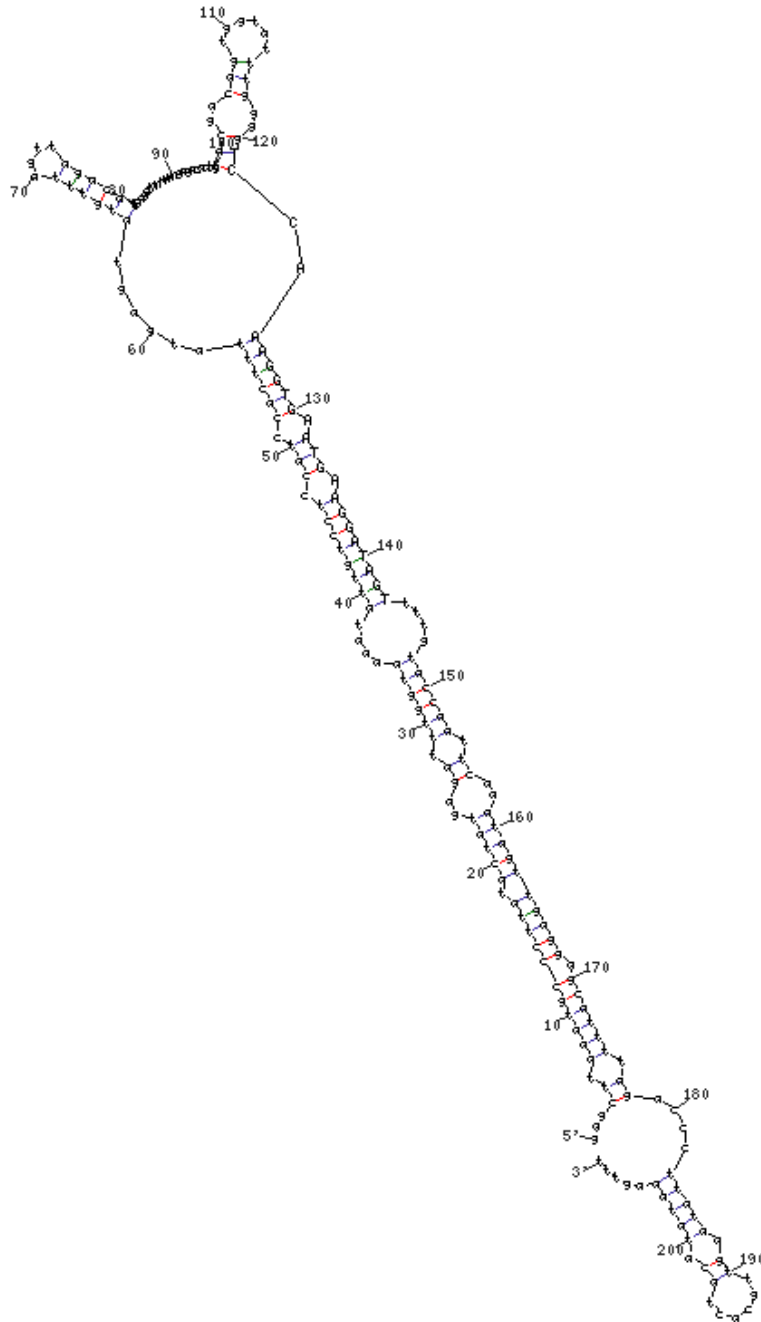

$$\Delta G = -54.6 \text{ kcal/mol PC-69}$$

**PC-69**

Output of `sir_graph ( )`  
by D. Stewart and M. Zuker

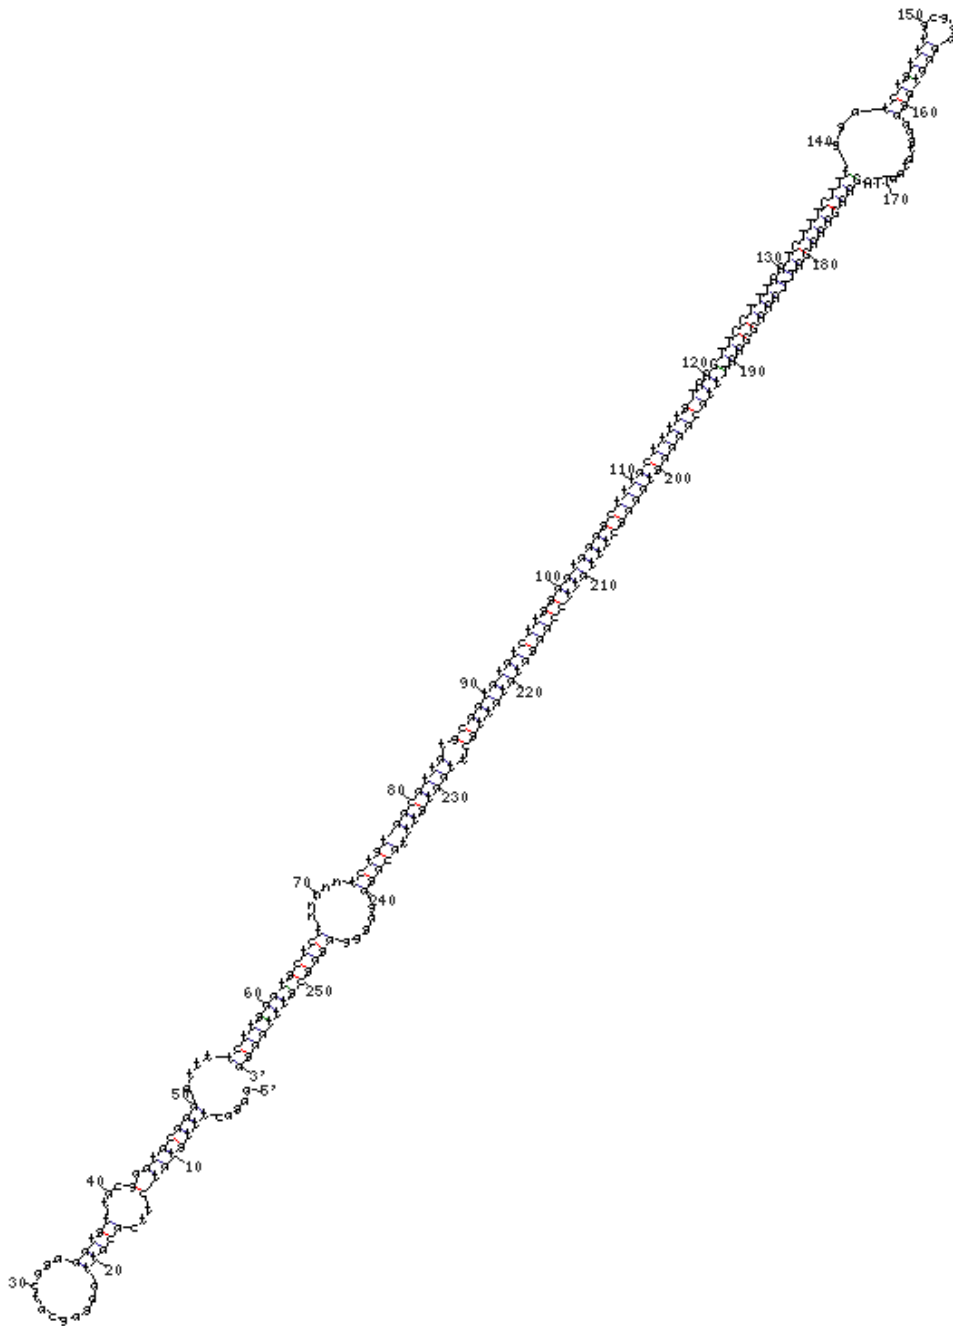

$$dG = -119.2 \text{ kcal/mol PC-70}$$

**PC-70**



Output of `sir_graph ( )`  
by D. Stewart and M. Zuker

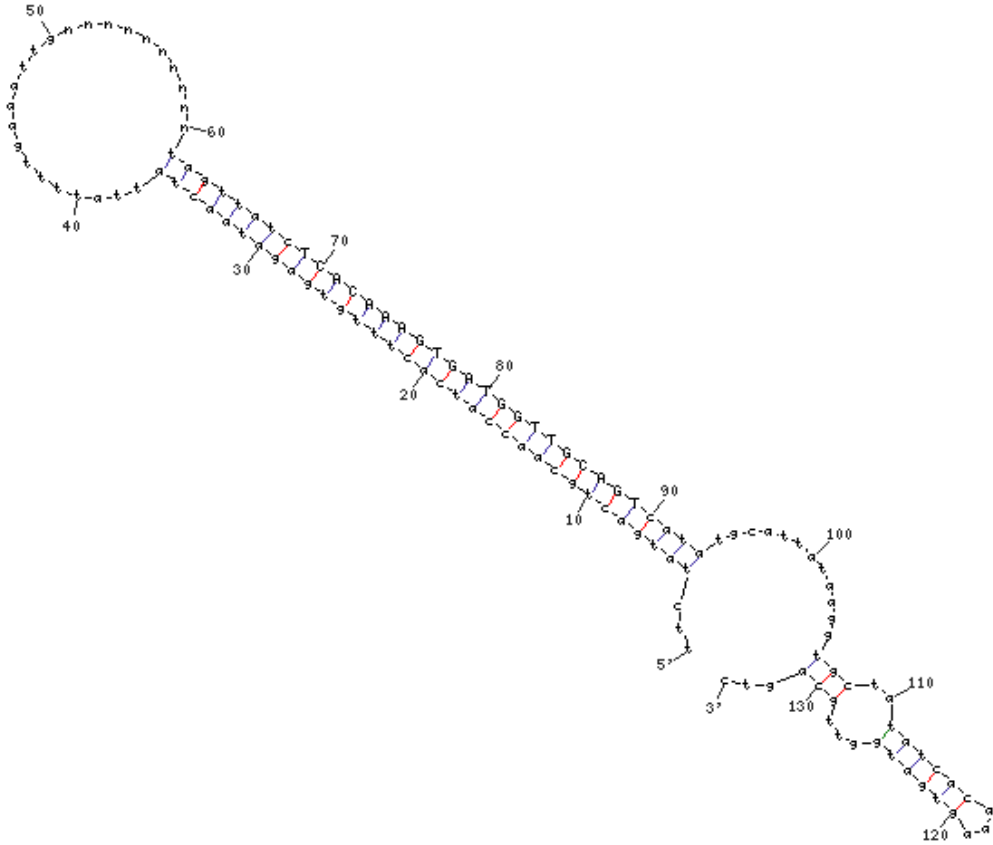

$$\Delta G = -61.8 \text{ kcal/mol PC-71}$$

**PC-71**

Output of `sir_graph ( )`  
by D. Stewart and M. Zuker

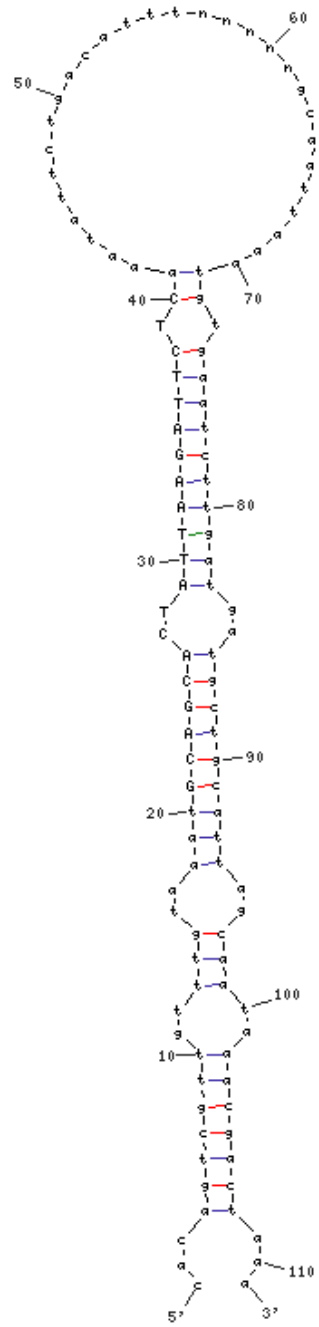

dG = -37.6 kcal/mol PC-72

## PC-72





Output of `sir_graph ( )`  
by D. Stewart and M. Zuker

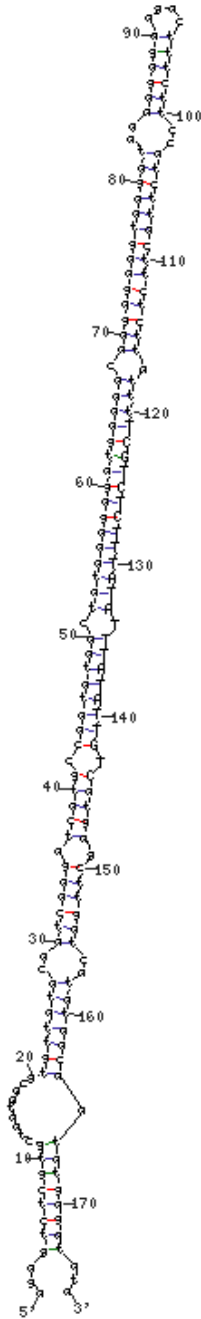

$dG = -77.8$  kcal/mol PC-75

**PC-75**











Output of `sir_graph ( )`  
by D. Stewart and M. Zuker

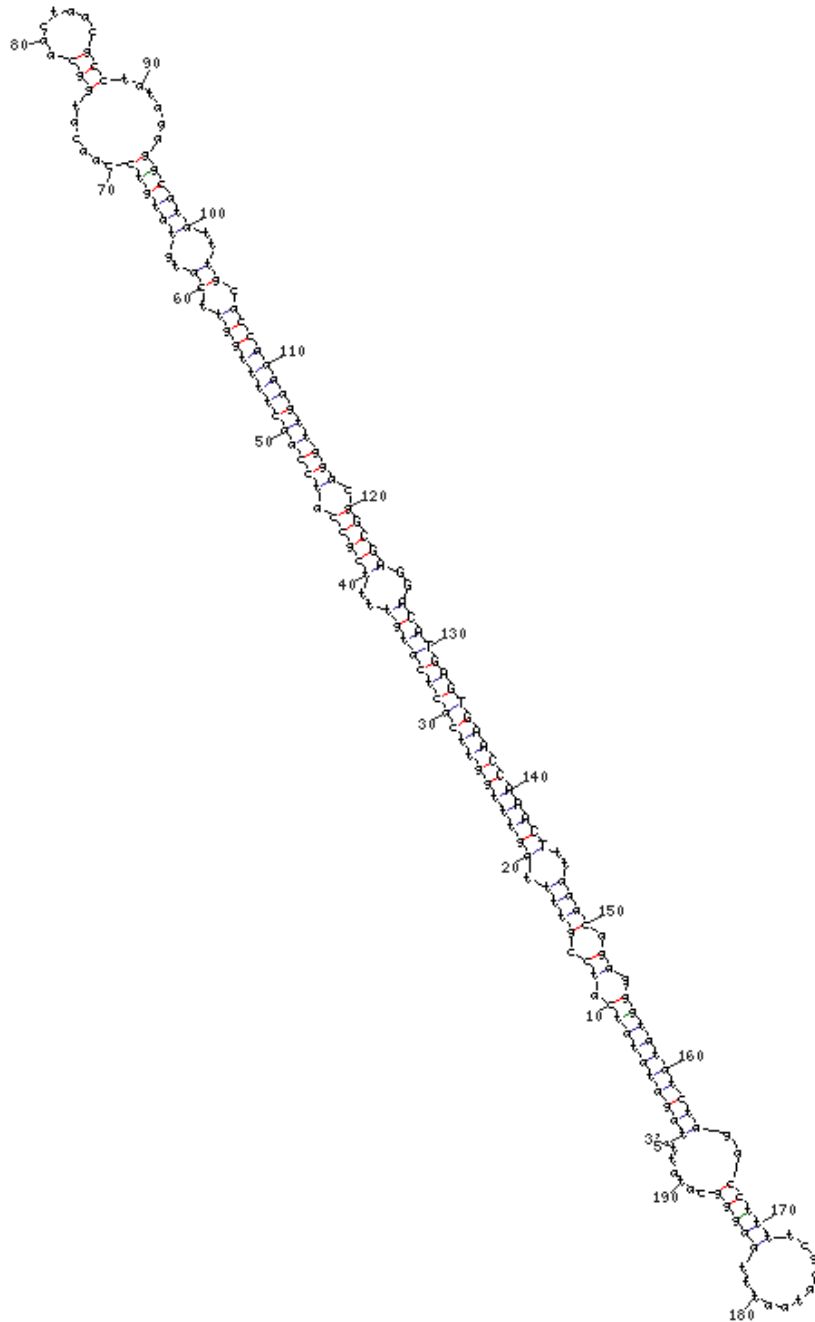

$$\Delta G = -95.4 \text{ kcal/mol PC-80}$$

**PC-80**

Output of `sir_graph ( )`  
by D. Stewart and M. Zuker

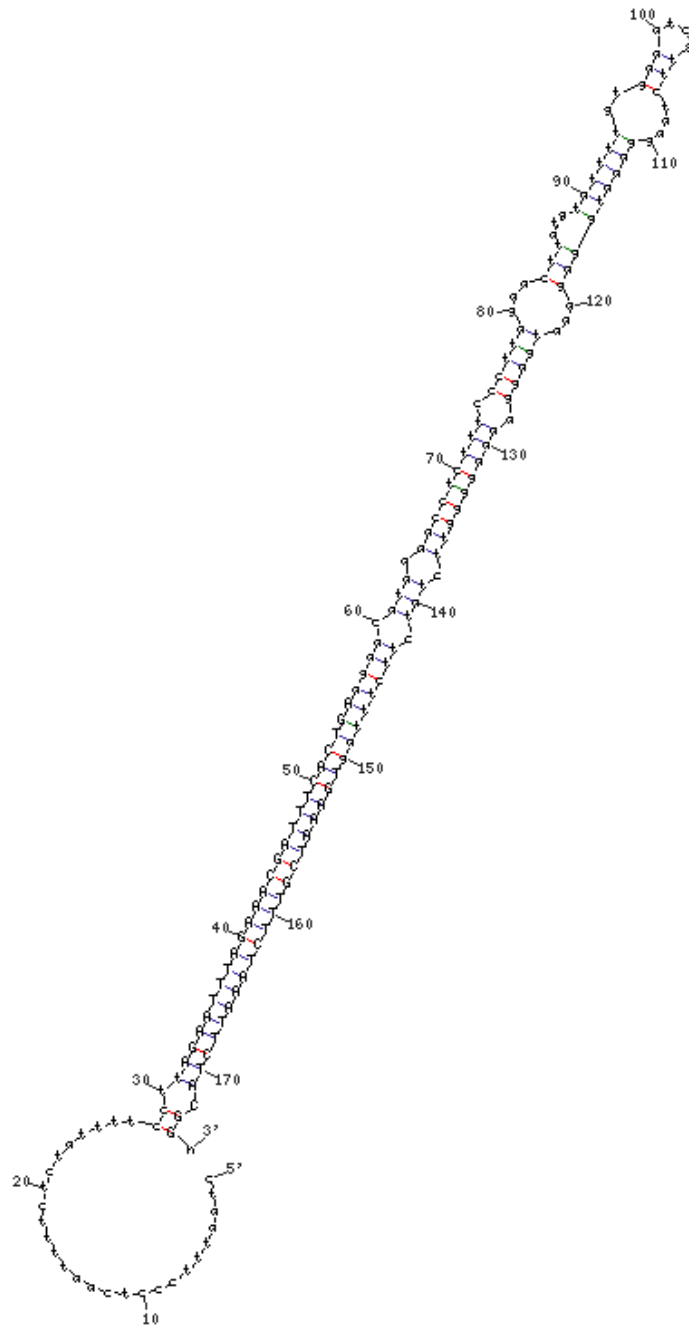

$dG = -64.1 \mu\text{PC-81}$

**PC-81**

Output of `mir_graph ( )`  
by D. Stewart and M. Zuker

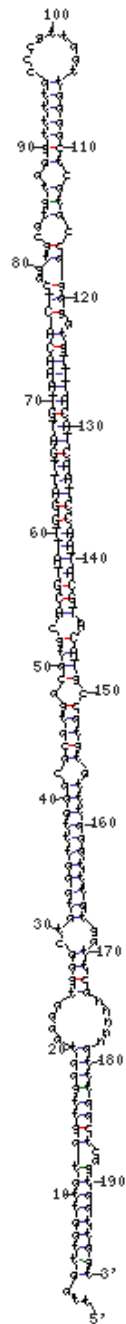

$dG = -74.4$  kcal/mol PC-82

**PC-82**

Output of `mir_graph ( )`  
by D. Stewart and M. Zuker

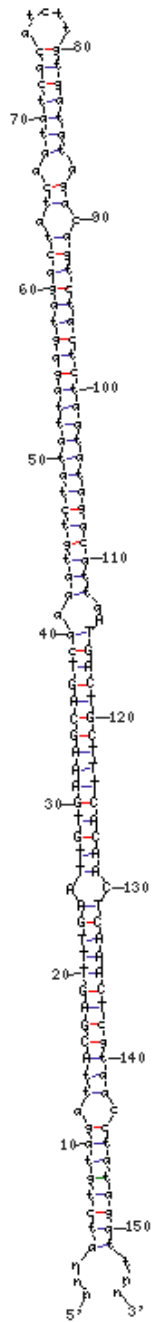

$dG = -94.7$  PC-83

**PC-83**



Output of `sir_graph ( )`  
by D. Stewart and M. Zuker

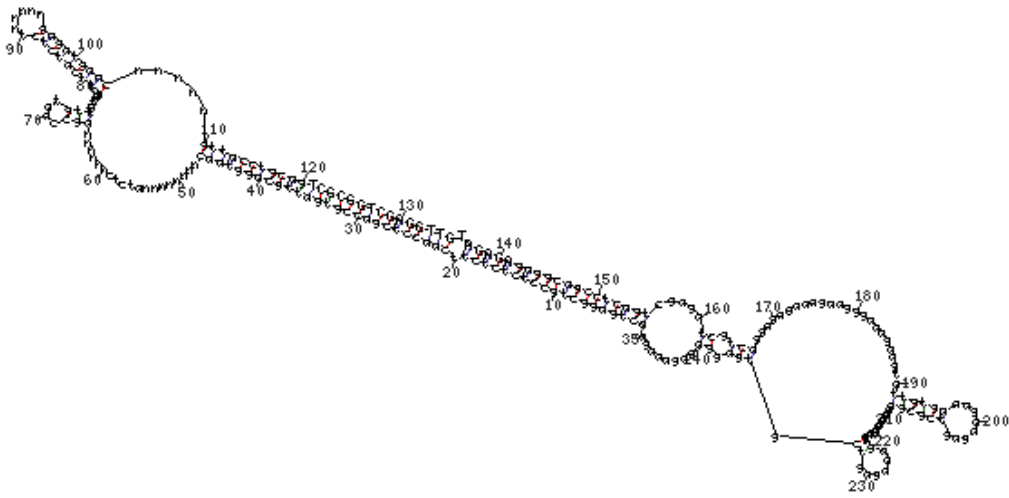

$$dG = -108.1 \mu\text{PC-85}$$

**PC-85**

Output of `sir_graph ( )`  
by D. Stewart and M. Zuker

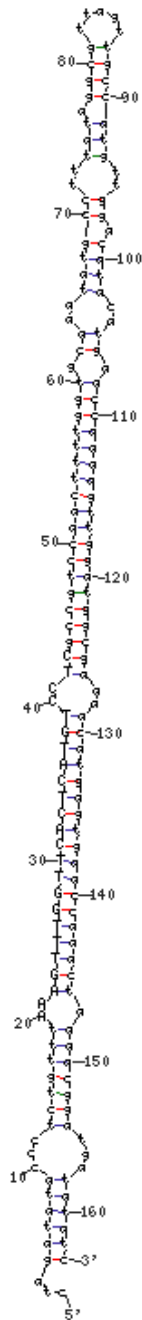

$dG = -88.5$  PC-86

**PC-86**



Output of `sir_graph ( )`  
by D. Stewart and M. Zuker

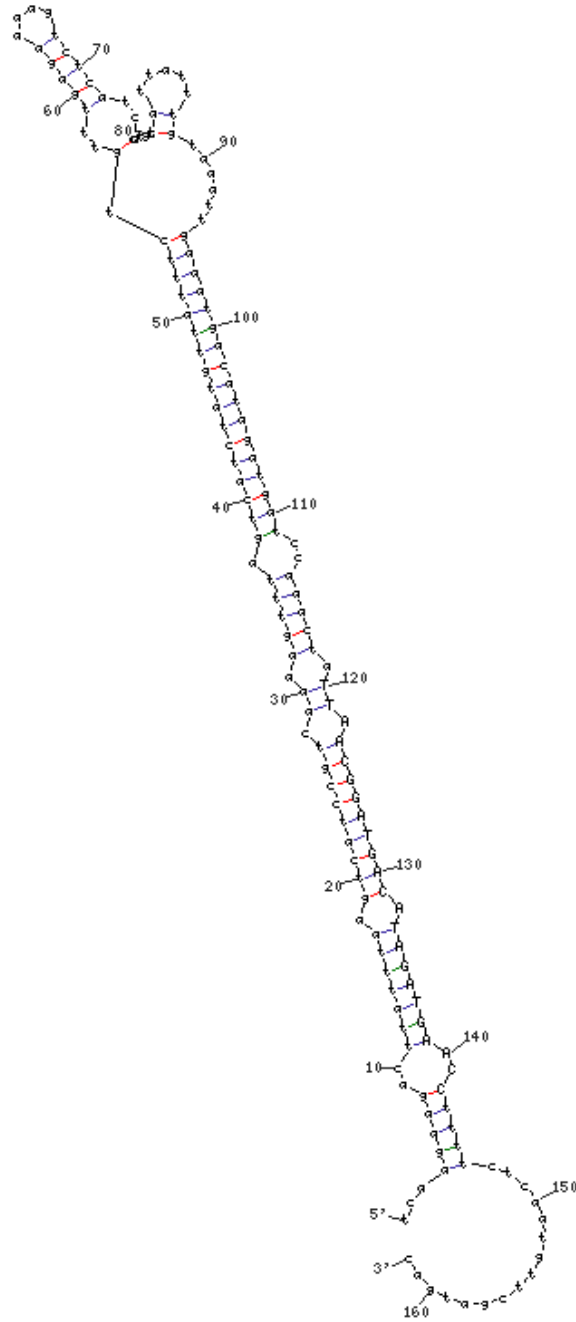

$$\Delta G = -53.7 \text{ kcal/mol PC-87}$$

**PC-87**

Output of `sir_graph ( )`  
by D. Stewart and M. Zuker

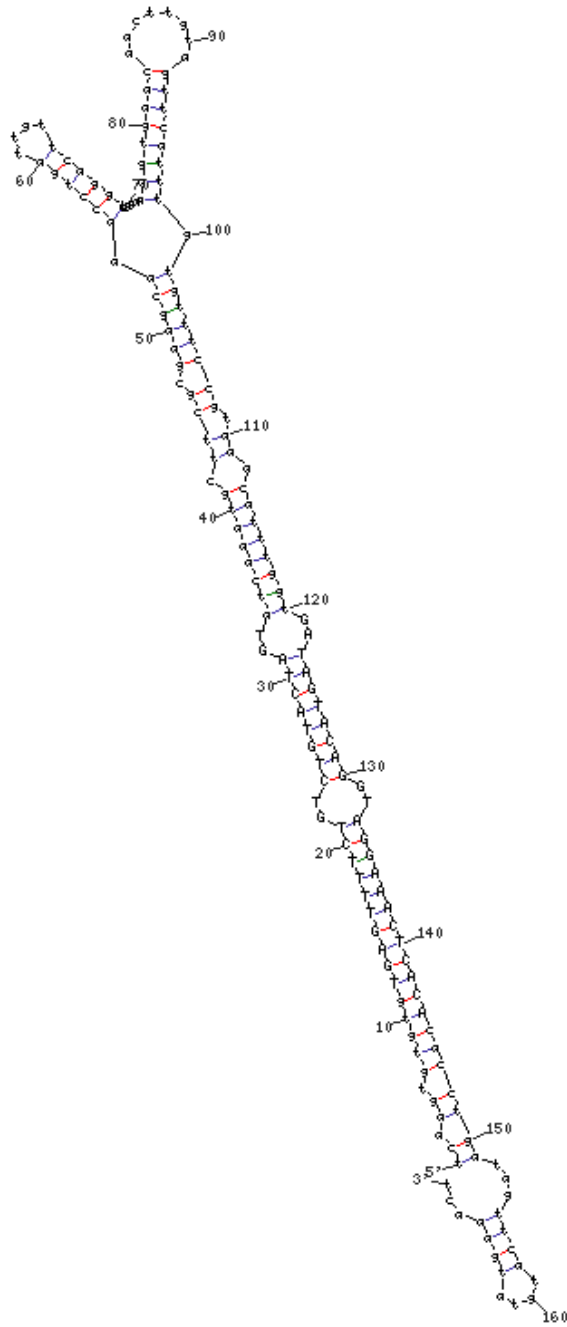

$$\Delta G = -72.1 \text{ kcal/mol PC-88}$$

**PC-88**

Output of `mir_graph ( )`  
by D. Stewart and M. Zuker

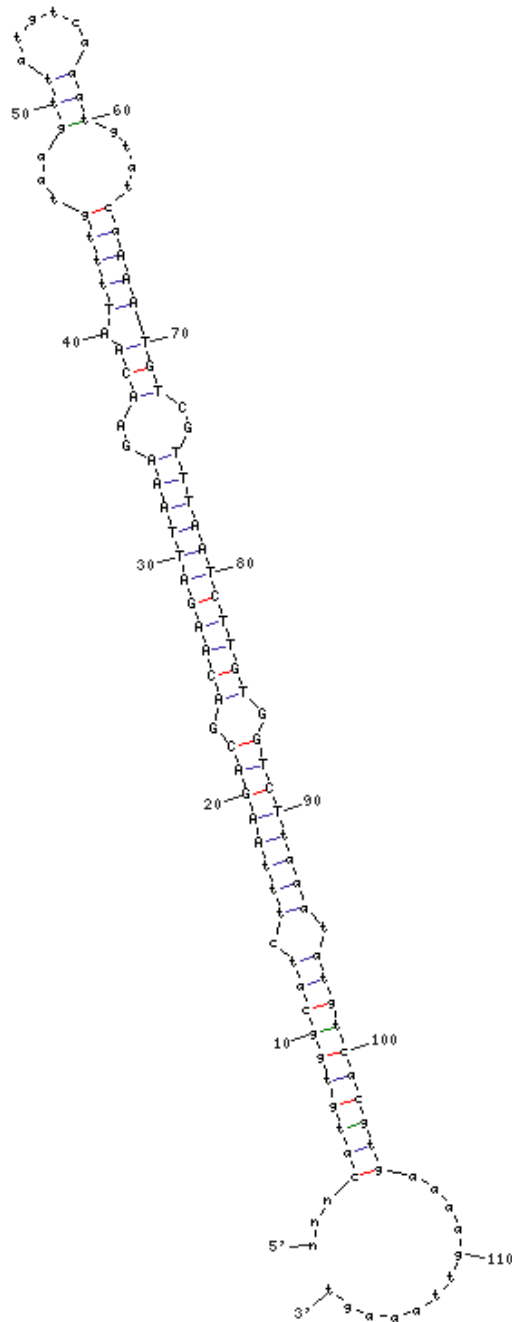

$dG = -42.9$  kcal/mol PC-89

**PC-89**

Output of `sir_graph ( )`  
by D. Stewart and M. Zuker

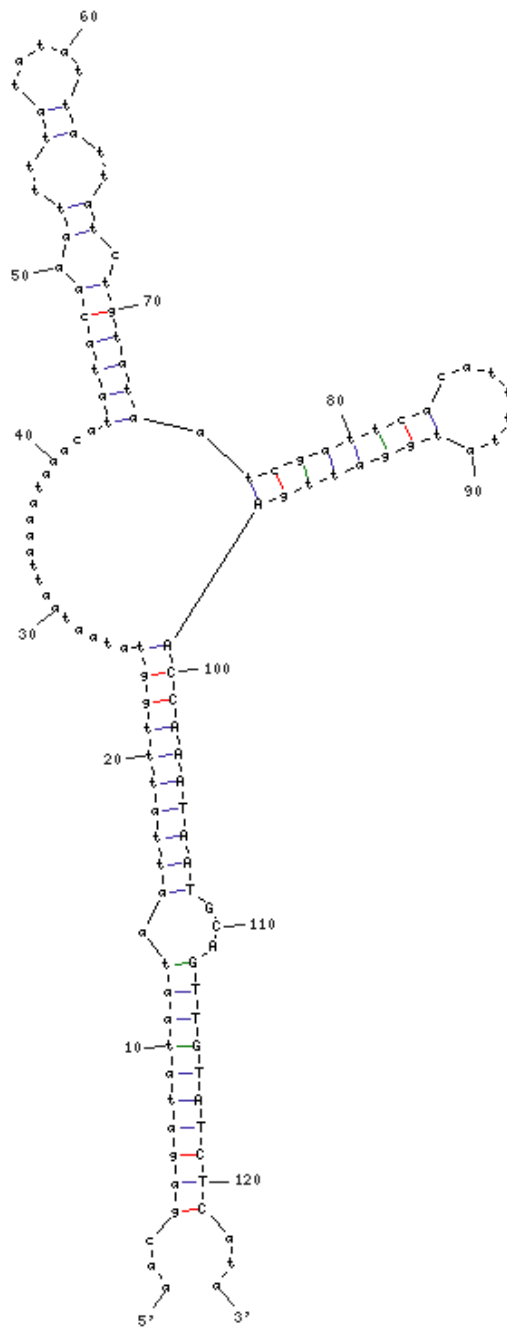

$dG = -29.5$  kcal/mol PC-90

**PC-90**



Output of `mir_graph ( )`  
by D. Stewart and M. Zuker

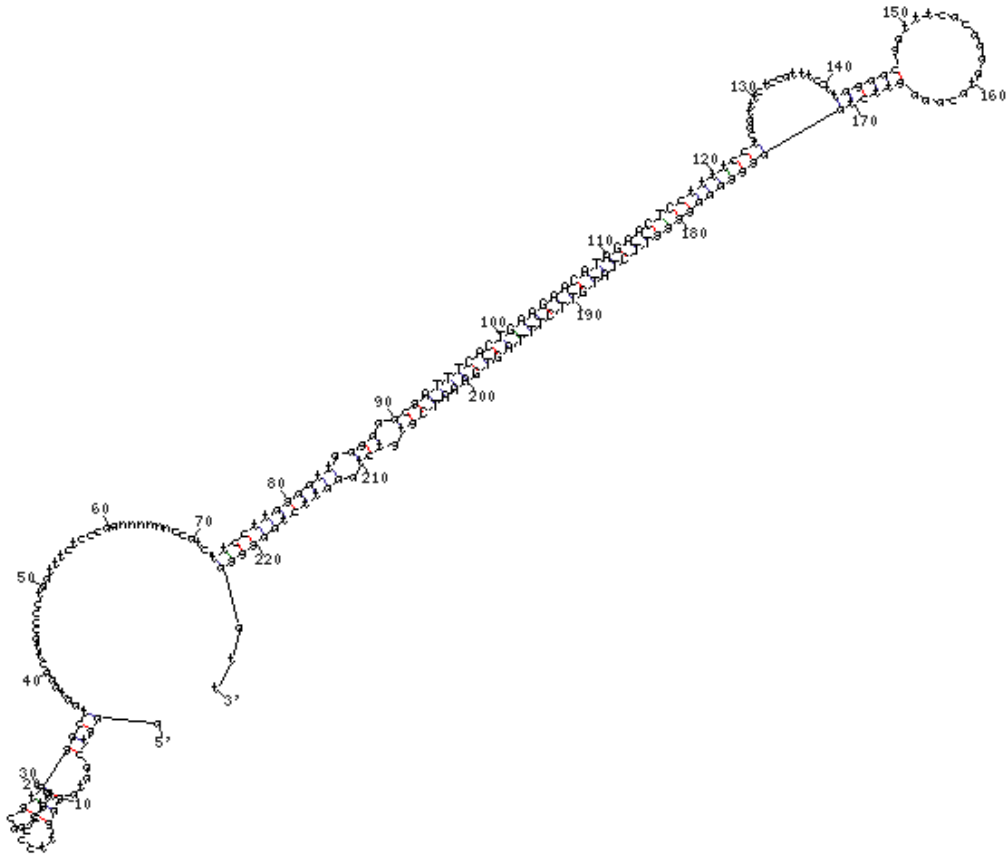

$$\Delta G = -81.6 \text{ kcal/mol}$$

## PC-92

**Supplementary Figure S1.** Folding structures of novel miRNAs in tomato LA2093 at a control temperature (26/18°C, NT), moderately elevated temperature (33/33°C, MET) and acutely elevated temperature (40/40°C, AET)

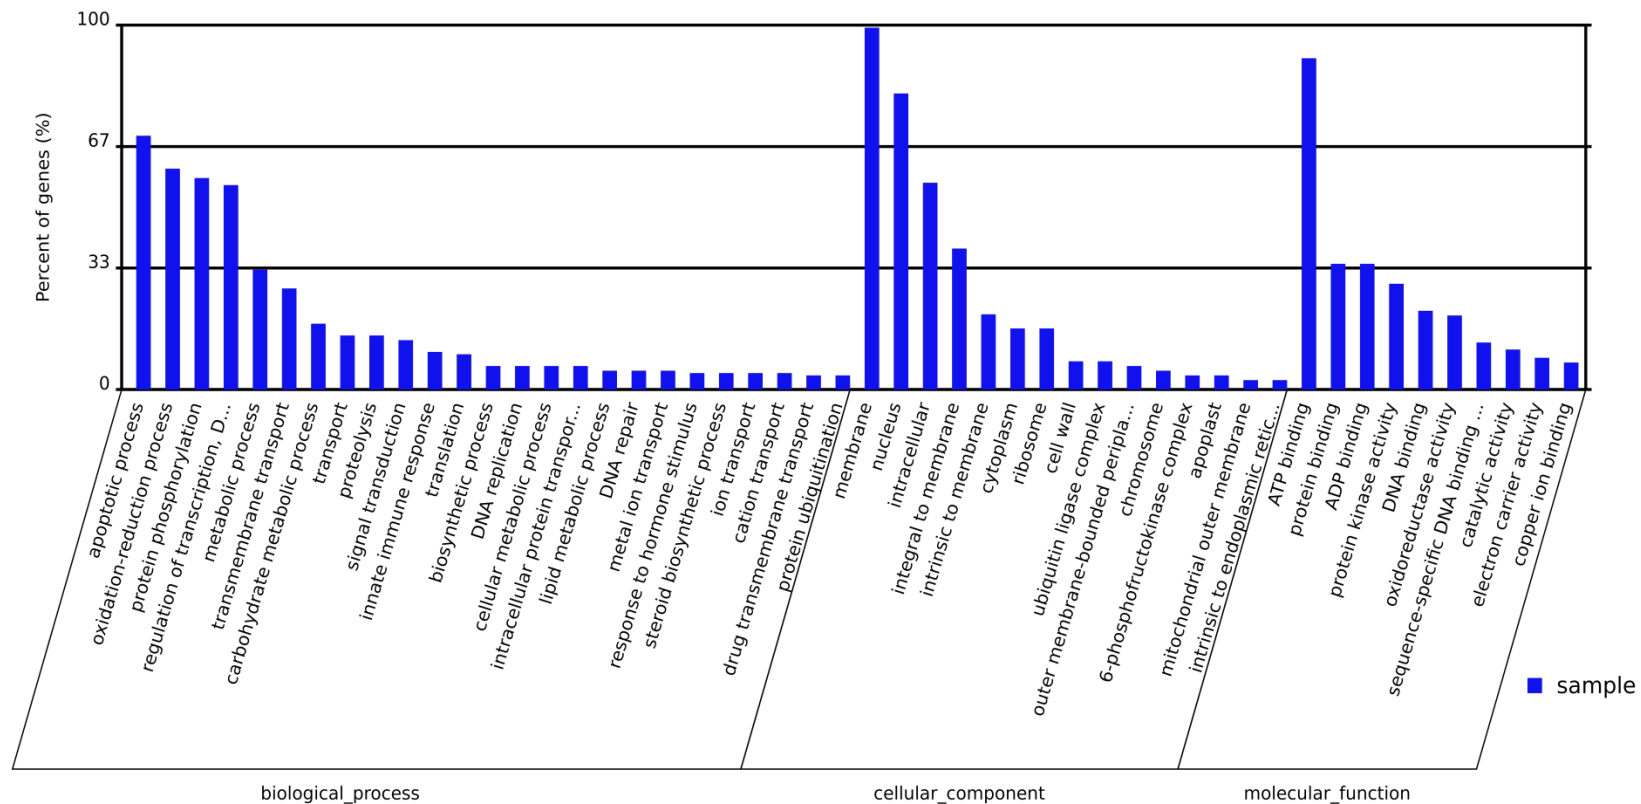

**Supplementary Figure S2.** GO functional annotation of target genes cleaved by conserved miRNAs in tomato LA2093

‘regulation of transcription, D...’ = ‘regulation of transcription, DNA-dependent’; ‘intracellular protein transport...’ = ‘intracellular protein transport’; ‘outer membrane-bounded peripla...’ = ‘outer membrane-bounded periplasmic space’; ‘intrinsic to endoplasmic retic...’ = ‘intrinsic to endoplasmic reticulum membrane’; ‘sequence-specific DNA binding...’ = ‘sequence-specific DNA binding transcription factor activity’.

### Statistics of GO Enrichment

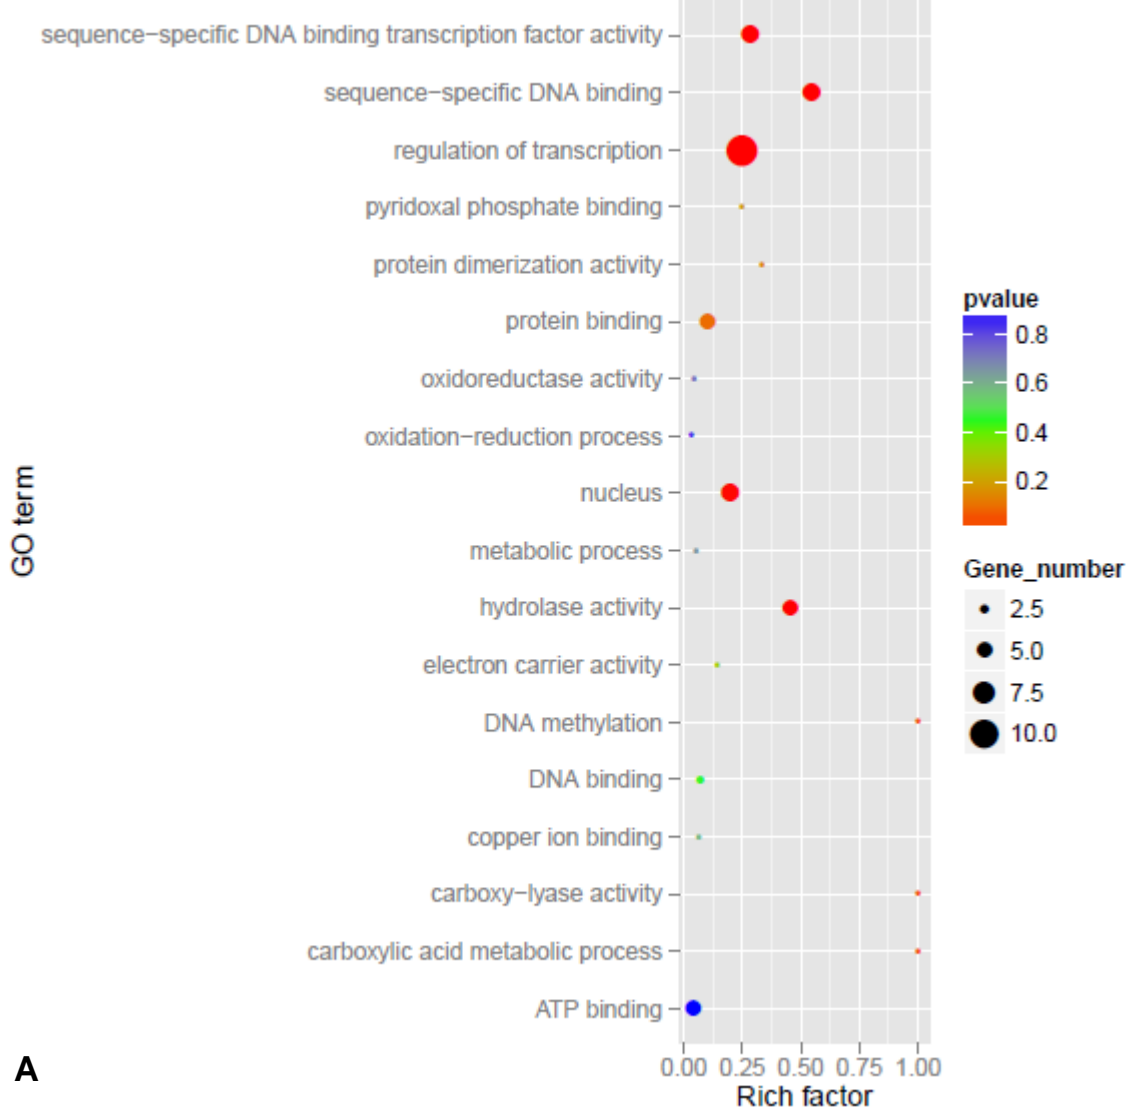

A



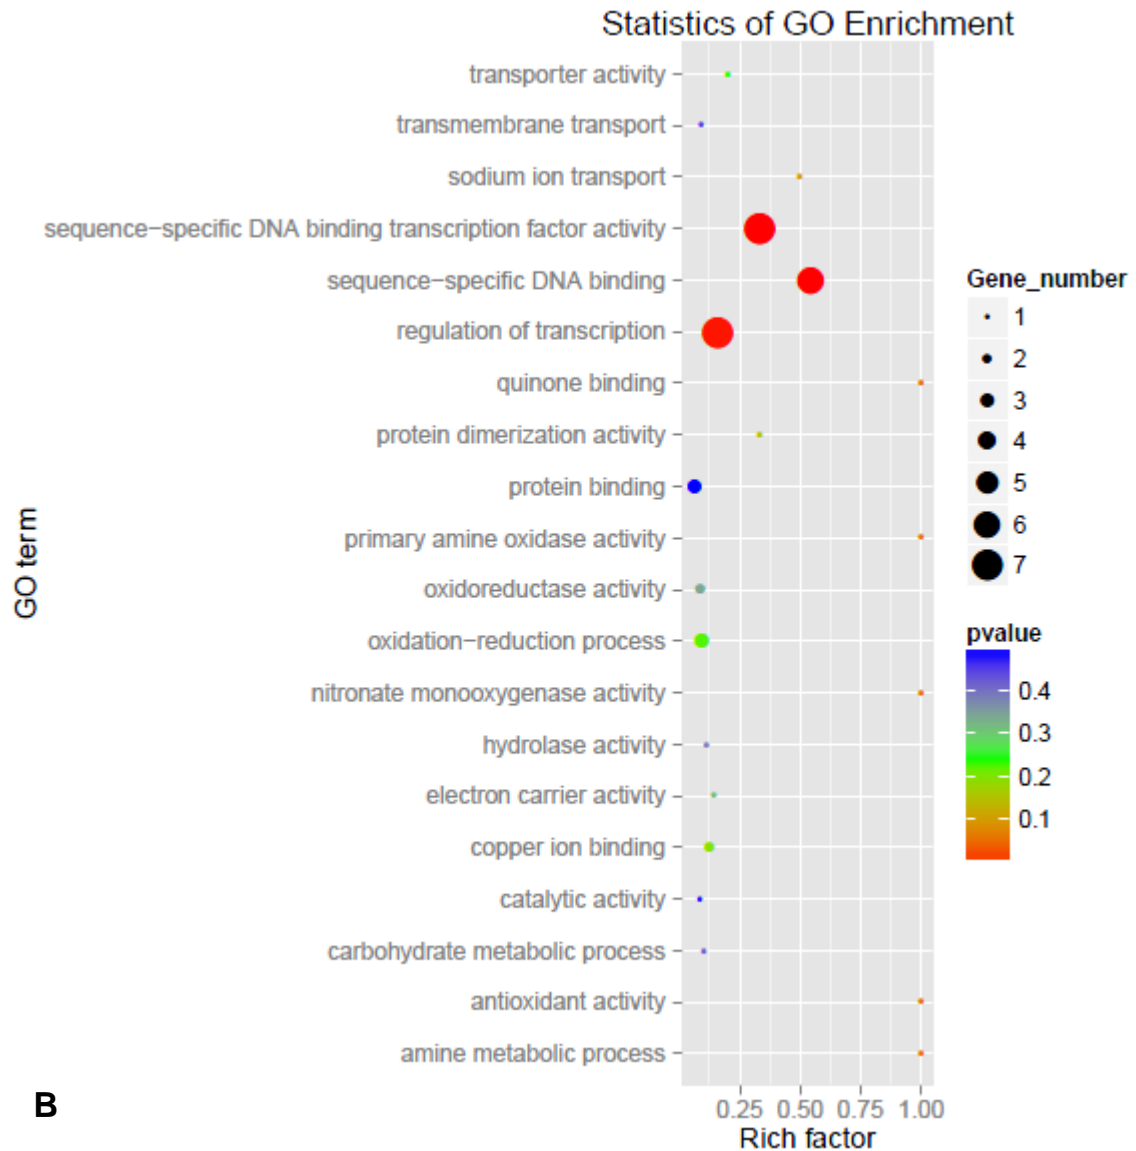

**Supplementary Figure S3.** GO enrichment analysis of the target genes that predicted by Targetfinder and detected by degrdome sequencing with different expression levels cleaved by miRNAs with different expression levels in tomato LA2093. **(A)** MET vs NT, **(B)** AET vs NT. The x-axis indicated rich factor; the y-axis indicated GO term. The size of the circle indicated the number of genes with the functions; the different colours of the circle indicated different significance levels.

spi-miR160\_tae slicing Solyc11g013470.1.1 at nt 554

alignment score=2 , category=0 , p=0.0117612922806944

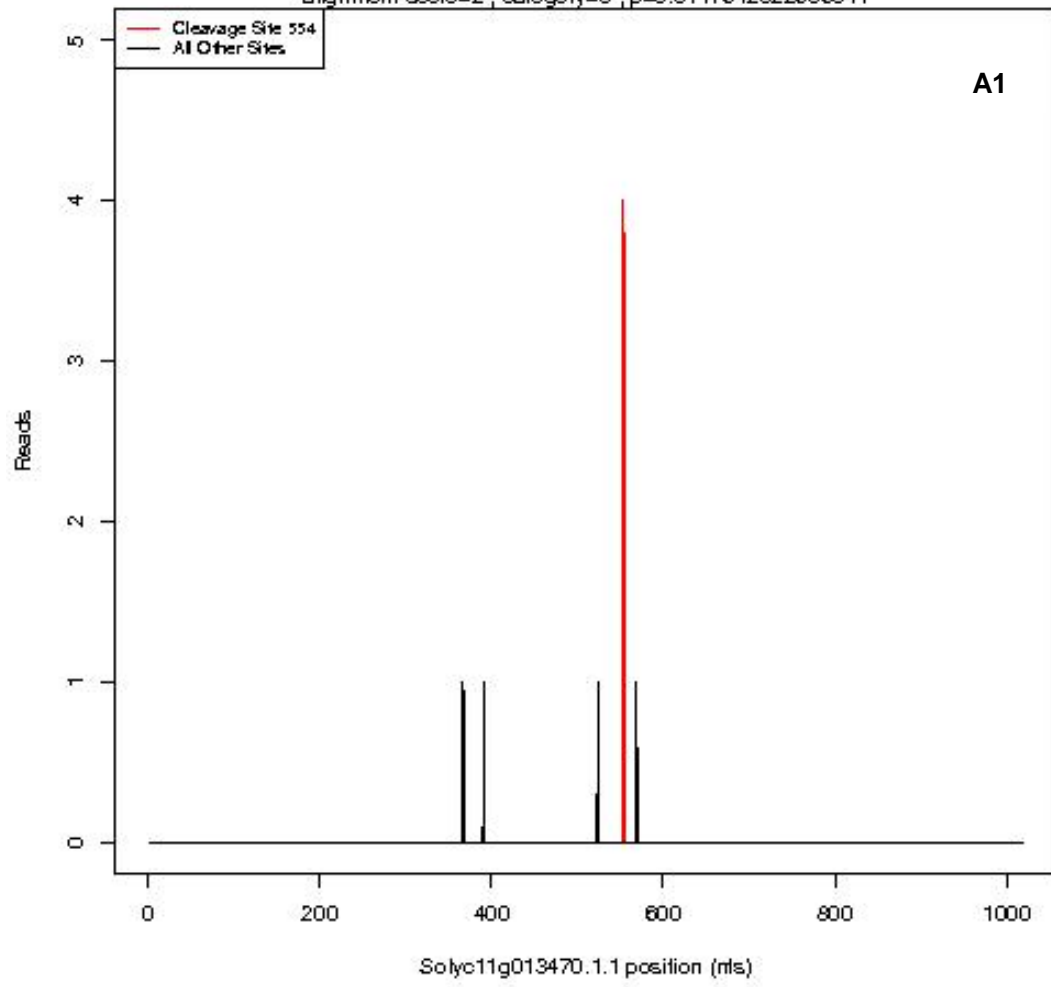

**spi-miR166a slicing Solyc02g069830.2.1 at nt 629**

alignment score=3.5 , category=0 , p=0.0114069300907224

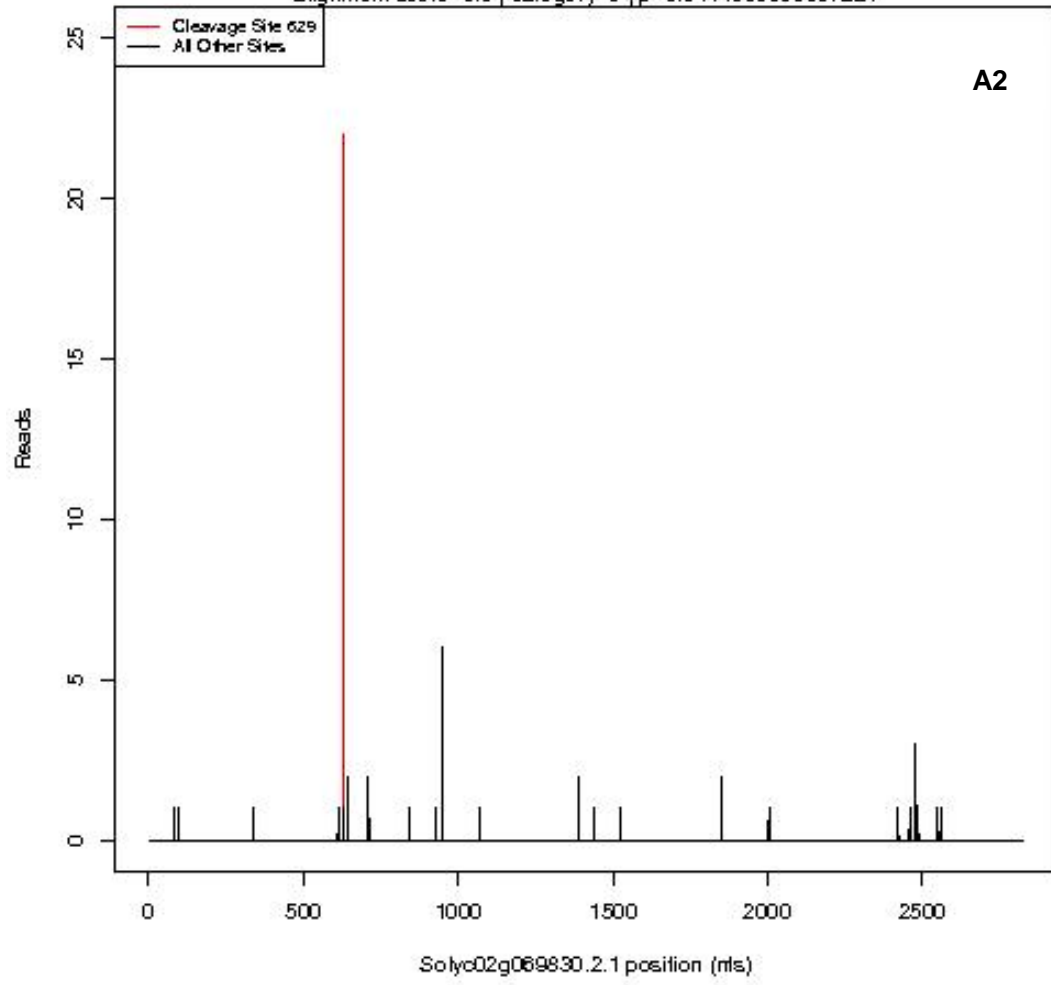

spi-miR166g\_osa slicing Solyc02g069830.2.1 at nt 629

alignment score=3 , category=0 , p=0.0223332965243024

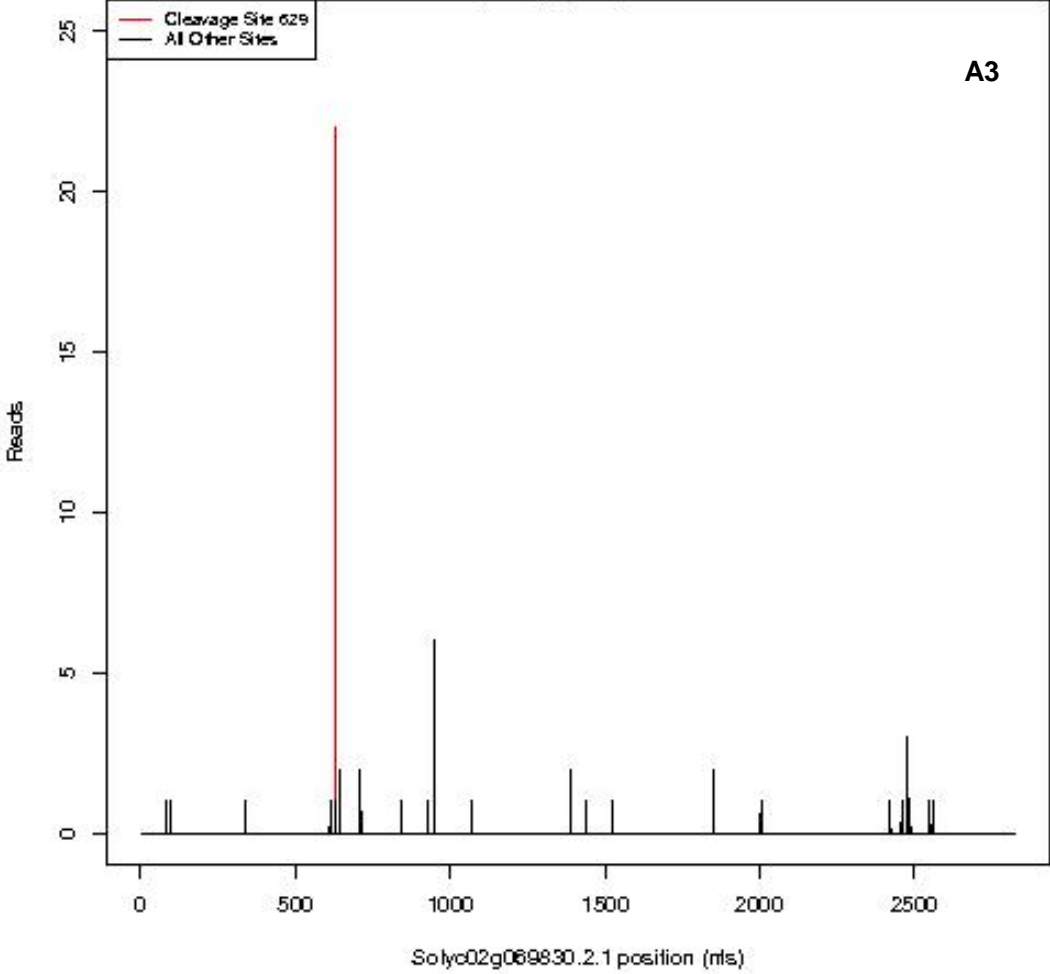

spi-miR160h\_ptc slicing Solyc11g013470.1.1 at nt 554

alignment score=1, category=0, p=0.00488991515137305

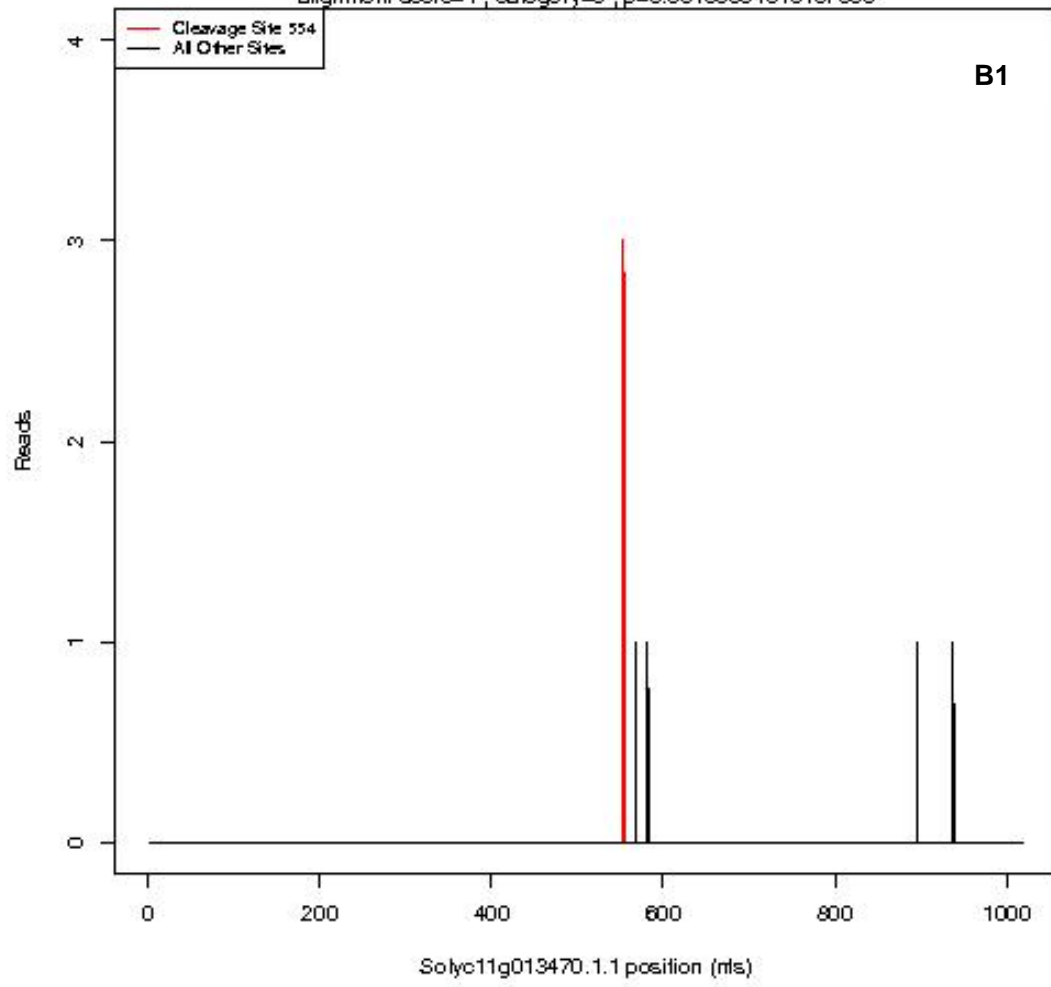

spi-miR166a slicing Solyc02g069830.2.1 at nt 629

alignment score=3 , category=0 , p=0.0134828014226729

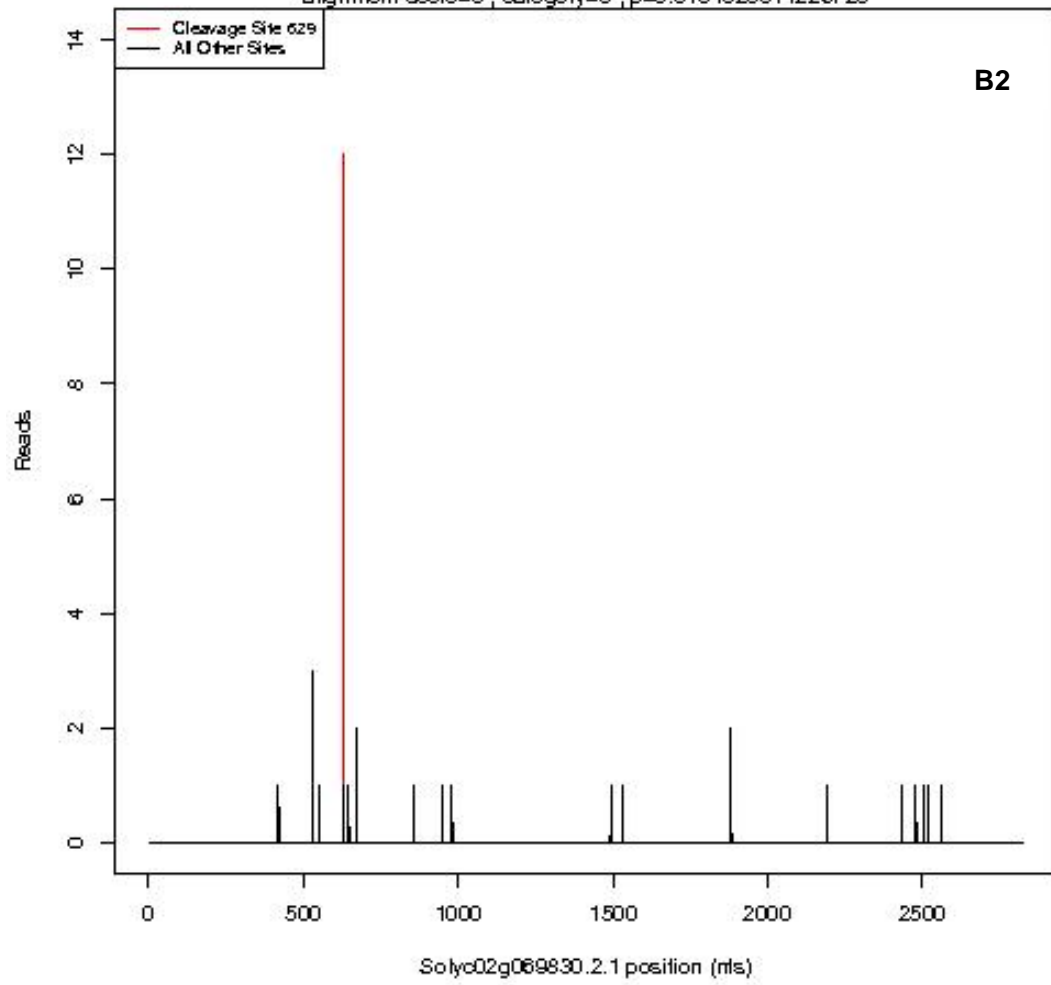

spi-miR396a-5p slicing Solyc12g096070.1.1 at nt 332

alignment score=3 , category=0 , p=0.0267838169111425

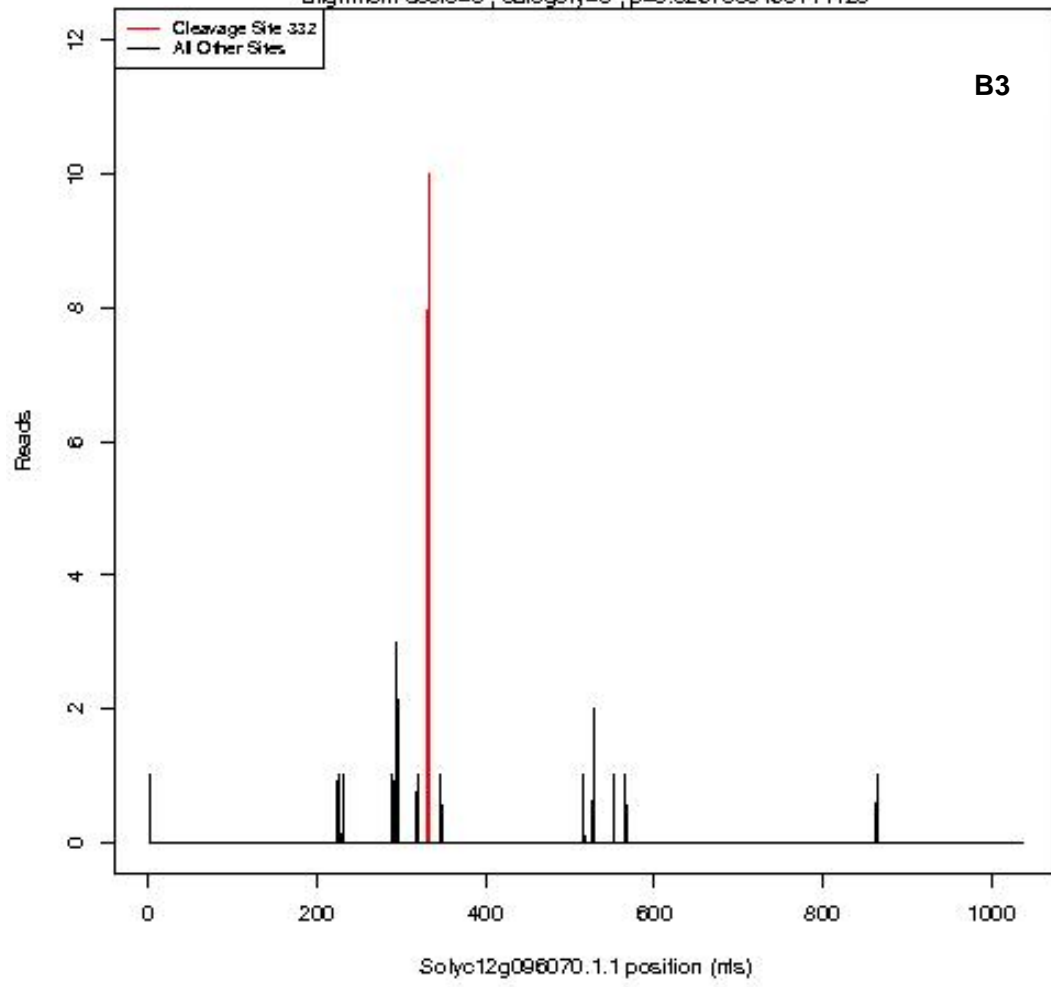

spi-miR160\_tae slicing Solyc11g013470.1.1 at nt 554

alignment score=2 , category=0 , p=0.0121978514222872

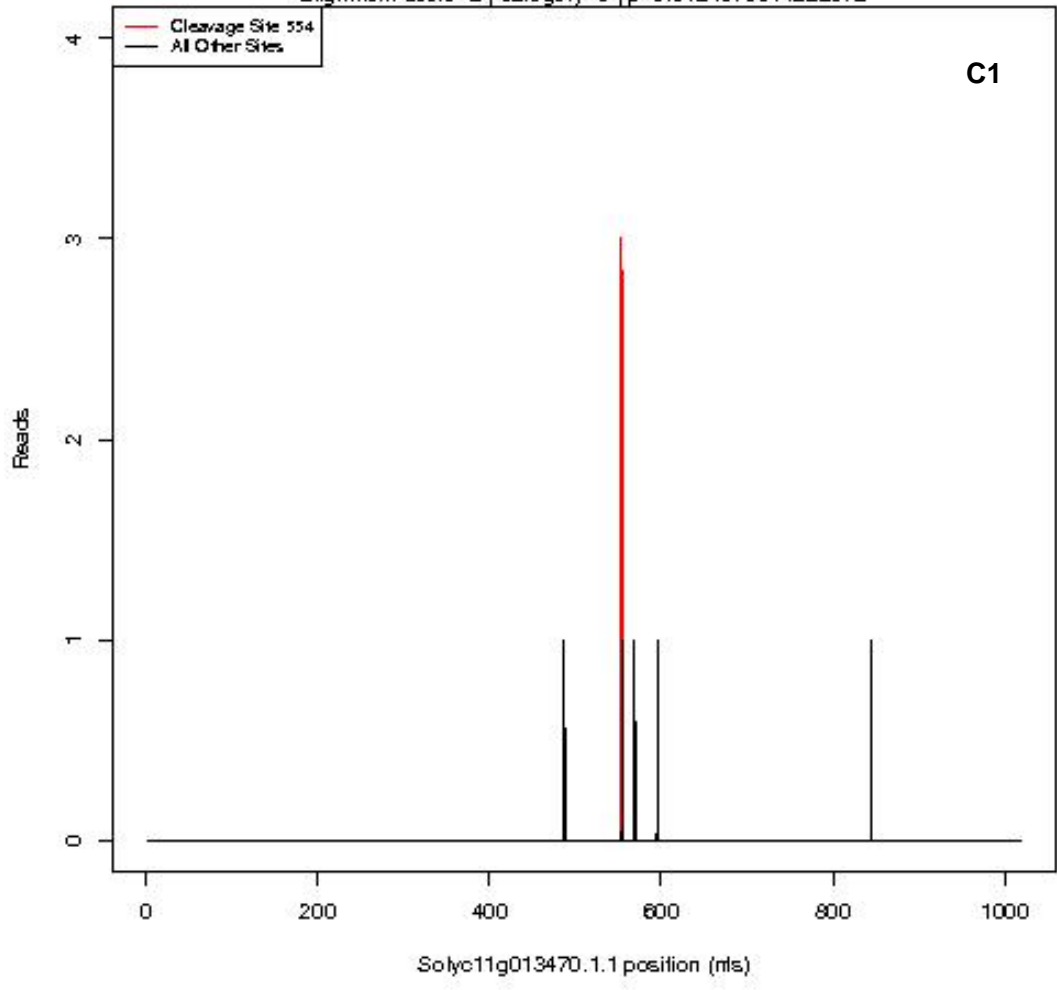



spi-miR166a slicing Solyc02g069830.2.1 at nt 629

alignment score=3 , category=0 , p=0.0132993416786804

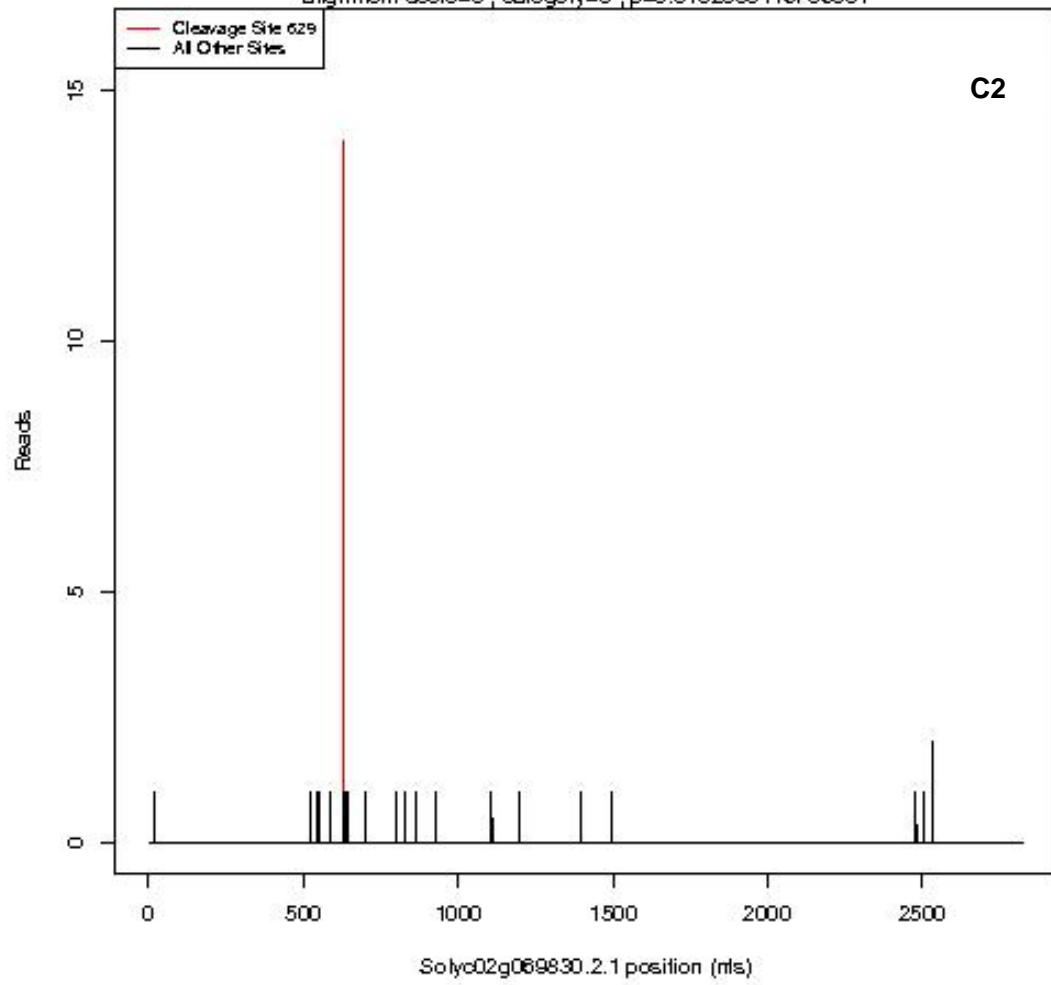

**spi-miR396a-5p slicing Solyc12g096070.1.1 at nt 332**

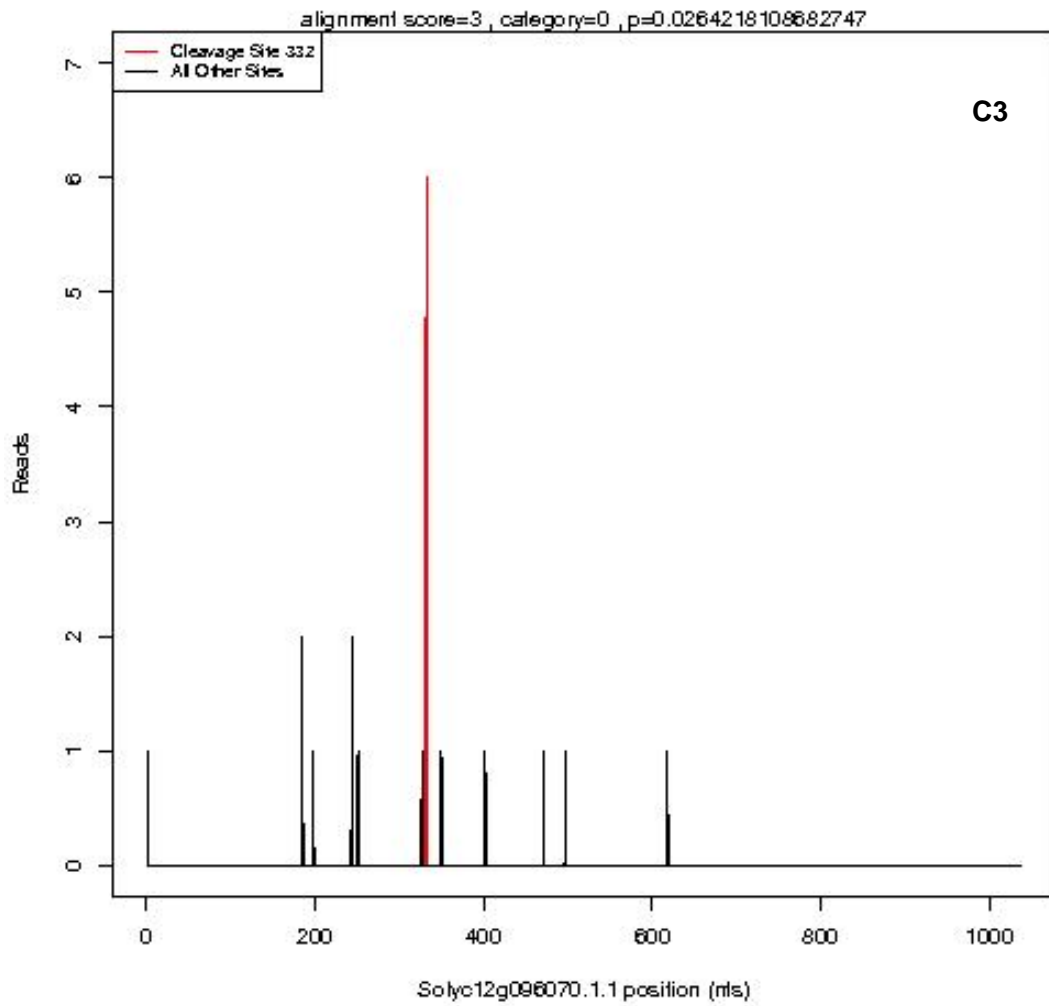

**Supplementary Figure S4.** Target plots of some mRNAs from category 0 in tomato LA2093 at **(A)** a control temperature (26/18°C, NT), **(B)** moderately elevated temperature (33/33°C, MET) and **(C)** acutely elevated temperature (40/40°C, AET)

**Supplementary Table S7.** GO functional annotation of the target genes cleaved by novel miRNAs in tomato LA2093

| Transcript_ID      | Annoation                                                           | miRNA    | GO term    | GO function        | GO functionos                       |
|--------------------|---------------------------------------------------------------------|----------|------------|--------------------|-------------------------------------|
| Solyc12g014350.1.1 | Leucine-rich repeat transmembrane protein kinase                    | PC-52-5p | GO:0006468 | biological process | protein phosphorylation             |
| Solyc01g105370.2.1 | Aldolase-type TIM barrel family protein                             | PC-44-3p | GO:0055114 | biological process | oxidation-reduction process         |
| Solyc07g051850.2.1 | aspartic proteinase A1                                              | PC-46-5p | GO:0006508 | biological process | proteolysis                         |
| Solyc07g051850.2.1 | aspartic proteinase A1                                              | PC-46-5p | GO:0006629 | biological process | lipid metabolic process             |
| Solyc02g091190.2.1 | adenosyl-L-methionine-dependent methyltransferases superfamily prot | PC-69-3p | GO:0008152 | biological process | metabolic process                   |
| Solyc12g014350.1.1 | Leucine-rich repeat transmembrane protein kinase                    | PC-52-5p | GO:0004672 | molecular function | protein kinase activity             |
| Solyc12g014350.1.1 | Leucine-rich repeat transmembrane protein kinase                    | PC-52-5p | GO:0005515 | molecular function | protein binding                     |
| Solyc12g014350.1.1 | Leucine-rich repeat transmembrane protein kinase                    | PC-52-5p | GO:0005524 | molecular function | ATP binding                         |
| Solyc01g105370.2.1 | Aldolase-type TIM barrel family protein                             | PC-44-3p | GO:0016491 | molecular function | oxidoreductase activity             |
| Solyc01g105370.2.1 | Aldolase-type TIM barrel family protein                             | PC-44-3p | GO:0018580 | molecular function | nitronate monooxygenase activity    |
| Solyc07g051850.2.1 | aspartic proteinase A1                                              | PC-46-5p | GO:0004190 | molecular function | spartic-type endopeptidase activity |
| Solyc02g091190.2.1 | adenosyl-L-methionine-dependent methyltransferases superfamily prot | PC-69-3p | GO:0008168 | molecular function | methyltransferase activity          |

**Supplementary Table S8.** KEGG pathway analysis of the target genes cleaved by miRNAs in tomato LA2093

| Transcript ID      | Annoation                            | miRNA               | KEGG ID | KEGG name                                   |
|--------------------|--------------------------------------|---------------------|---------|---------------------------------------------|
| Solyc04g008740.2.1 | Pyruvate kinase family protein       | spi-miR2275c-5p_ata | ko00010 | Glycolysis / Gluconeogenesis                |
| Solyc01g073740.2.1 | Citrate synthase family protein      | spi-miR396b-p5_osa  | ko00020 | Citrate cycle (TCA cycle)                   |
| Solyc03g115820.2.1 | D-ribulose-5-phosphate-3-epimerase   | spi-miR3630-3p_vvi  | ko00030 | Pentose phosphate pathway                   |
| Solyc03g115820.2.1 | D-ribulose-5-phosphate-3-epimerase   | spi-miR3630-3p_vvi  | ko00040 | Pentose and glucuronate interconversions    |
| Solyc04g008740.2.1 | Pyruvate kinase family protein       | spi-miR2275c-5p_ata | ko00230 | Purine metabolism                           |
| Solyc03g005260.2.1 | ATP sulfurylase 1                    | spi-miR395a_stu     | ko00230 | Purine metabolism                           |
| Solyc03g005730.2.1 | propyl malate isomerase large subuni | spi-miR384-5p_stu   | ko00290 | Valine, leucine and isoleucine biosynthesis |
| Solyc03g005260.2.1 | ATP sulfurylase 1                    | spi-miR395a_stu     | ko00450 | Selenoamino acid metabolism                 |
| Solyc08g063080.2.1 | sulfoquinovosyldiacylglycerol 1      | spi-miR9470-3p      | ko00520 | mino sugar and nucleotide sugar metabolism  |
| Solyc09g020190.2.1 | non-specific phospholipase C1        | spi-miR9470-3p      | ko00562 | Inositol phosphate metabolism               |
| Solyc09g020190.2.1 | non-specific phospholipase C1        | spi-miR9470-3p      | ko00564 | Glycerophospholipid metabolism              |
| Solyc04g008740.2.1 | Pyruvate kinase family protein       | spi-miR2275c-5p_ata | ko00620 | Pyruvate metabolism                         |
| Solyc04g008740.2.1 | Pyruvate kinase family protein       | spi-miR2275c-5p_ata | ko00710 | Carbon fixation in photosynthetic organisms |
| Solyc05g054080.2.1 | ubiquitin protein ligase 5           | spi-miR9471a-3p     | ko04120 | Ubiquitin mediated proteolysis              |
| Solyc06g061000.2.1 | casein kinase II beta subunit 4      | spi-miR319-p5_stu   | ko04310 | Wnt signaling pathway                       |
| Solyc06g061000.2.1 | casein kinase II beta subunit 4      | spi-miR319-p5_stu   | ko04520 | Adherens junction                           |
| Solyc06g061000.2.1 | casein kinase II beta subunit 4      | spi-miR319-p5_stu   | ko04530 | Tight junction                              |

**Supplementary Table S9.** Specific qRT-PCR primers for the miRNAs identified in tomato LA2093

| Number    | miRNAs             | Stem-loop primer                                    | Length of reverse transcribed fragments | qRT-PCR primer | Sequence (5'to 3') for qRT-PCR                 | Length of amplified fragment |
|-----------|--------------------|-----------------------------------------------------|-----------------------------------------|----------------|------------------------------------------------|------------------------------|
| 1         | spi-miR159         | GTCGTATTCTGTGCTGGGTGGAAGTGTCTCGCACTGAATACGACGAGCTC  | 50                                      | F<br>R         | CGGACGAGTTTGGATTGA<br>TATTCTGTGCTGGGTGGA       | 60                           |
| 2         | spi-miR168a-5p     | GTCGTATTCTGTGCTGGGTGGAAGTGTCTCGCACTGAATACGACGTCCCG  | 50                                      | F<br>R         | CGGACGAGTCGCTTGGTG<br>CGTATTCTGTGCTGGGTGGA     | 62                           |
| 3         | spi-miR171d        | GTCGTATTCTGTGCTGGGTGGAAGTGTCTCGCACTGAATACGACCGTGAT  | 50                                      | F<br>R         | AAGGACGAGTTGAGCCGC<br>GTATTCTGTGCTGGGTGG       | 60                           |
| 4         | spi-miR319a        | GTCGTATCCAGTGCAGGGTCCGAGGTATTTCGCACTGGATACGACAAGGAG | 50                                      | F<br>R         | ACGGCGTTGGACTGAAGG<br>CGCAGGGTCCGAGGTATT       | 60                           |
| 5         | spi-miR408b-3p_stu | GCGTGGTCCACACCACCTGAGCCGCCACGACCACGCAGCCAGGG        | 44                                      | F<br>R         | CAACAATGCACTGCCTCTTCC<br>TCCACACCACCTGAGCCG    | 57                           |
| 6         | PC-49-3p           | GTCGTATCCAGTGCAGGGTCCGAGGTATTTCGCACTGGATACGACCACGTT | 50                                      | F<br>R         | CCGCCGCTATGAGATAAGTTC<br>CAGTGCAGGGTCCGAGGTA   | 63                           |
| 7         | PC-65-3p           | GTCGTATCCAGTGCAGGGTCCGAGGTATTTCGCACTGGATACGACAGGGGT | 50                                      | F<br>R         | CGGTCAACATGTGTTCTCAGGT<br>CAGTGCAGGGTCCGAGGTAT | 65                           |
| Reference | U6snRNA            | GTGCAGGGTCCGAGGTTTGGACCATTCTCGAT                    | /                                       | F<br>R         | GGAACGATACAGAGAAGATTAGCA<br>GTGCAGGGTCCGAGGT   | /                            |

**Supplementary Table S10.** Specific qRT-PCR primers for the target genes cleaved by miRNAs in tomato LA2093

| Number    | Target genes       | Primer | Sequence (5'to 3')                                | Length of amplified fragment | miRNAs          |
|-----------|--------------------|--------|---------------------------------------------------|------------------------------|-----------------|
| 1         | Solyc12g014120.1.1 | F<br>R | TTACCACCACCATCAACAAT<br>ACAGACGACCAACTTAACTC      | 152                          | spi-miR159      |
| 2         | Solyc11g013470.1.1 | F<br>R | CGCCAATCCCACAGTTTC<br>GGGCTACTGAGTCCAATCGT        | 171                          | spi-miR160a     |
| 3         | Solyc06g072300.2.1 | F<br>R | TCTTGATGATGATGATGGA<br>CTCACGCAGAACAATATC         | 169                          | spi-miR168a-5p  |
| 4         | Solyc11g013150.1.1 | F<br>R | CAGGTGACTCCAATAACAATC<br>AATACGCAGCCAATCTCT       | 189                          | spi-miR171d     |
| 5         | Solyc02g070550.2.1 | F<br>R | TCAAGCGAAGAAGAAGAAGGA<br>GAAGCGGTCTGAGAAGGTATAGG  | 162                          | spi-miR8029_stu |
| 6         | Solyc02g091190.2.1 | F<br>R | CAGCGTGAGATTGACATT<br>AAGAACTTGACATTGGTGAA        | 182                          | PC-69-3p        |
| Reference | Actin              | F<br>R | GAAATAGCATAAGATGGCAGACG<br>ATACCCACCATCACACCAGTAT | 159                          | /               |
